# Supplementary material for: Interplay between ATRX and IDH1 mutations governs innate immune responses in diffuse gliomas
Source: Springer Nature journal article supplement (doi:10.1038/s41467-024-44932-w), 2024-01-25
Supplement: MOESM1 [file 41467_2024_44932_MOESM1_ESM.pdf]

## Supplementary information

Interplay between *ATRX* and *IDH1* mutations governs innate immune responses in diffuse gliomas

Hariharan, S., Whitfield, B. T., *et al.*

# Supplementary figure 1

## a Innate immune gene sets

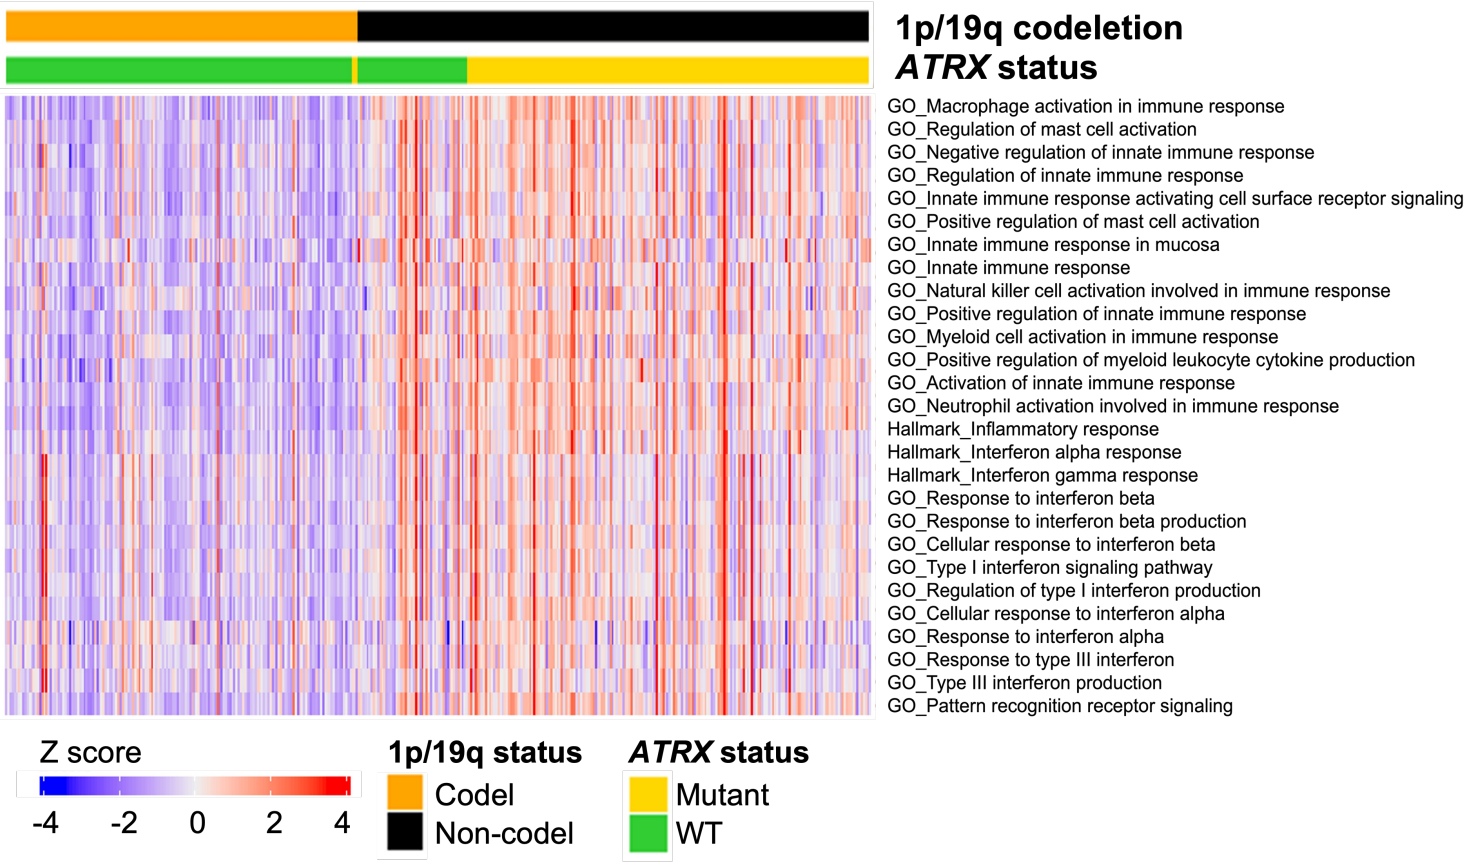

## b General & adaptive immune gene sets

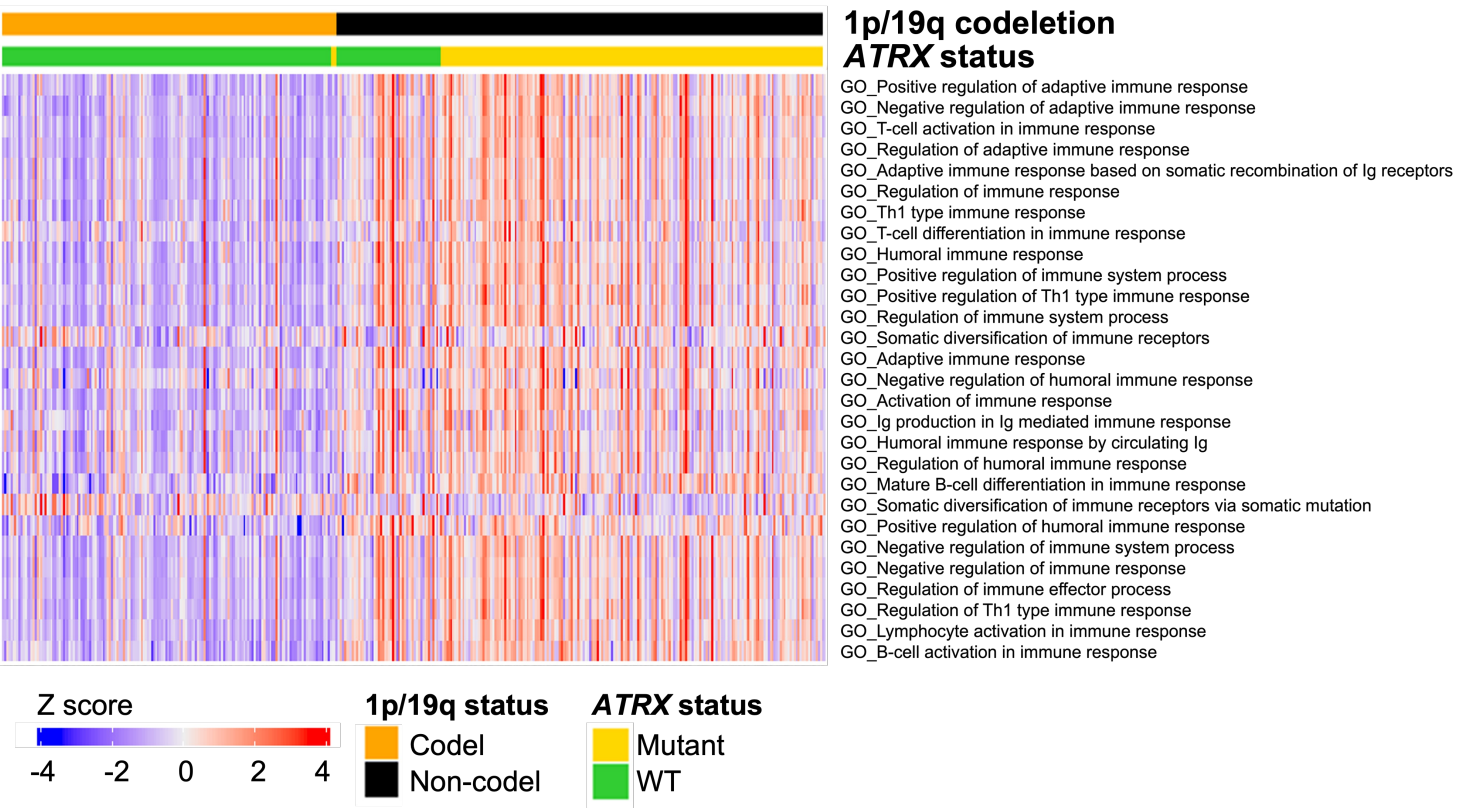

**Supplementary figure 1 – supporting figure 1a. Astrocytomas are immunologically engaged compared to oligodendrogliomas.**

(a, b) Heatmap from ssGSEA showing enrichment for various innate immune-related (a) and general and adaptive immune-related (b) gene sets from [CNS/Brain TCGA LGG PanCancer Atlas Study](#), comparing 1p-19q noncode/ *IDH* mutant/ *ATRX*-mutant astrocytomas (n=191) to 1p-19q code/ *IDH* mutant/ *ATRX*-WT oligodendrogliomas (n=164). A relatively smaller number of 1p-19q code/ *IDH* mutant/ *ATRX*-mutant (n=3) and 1p-19q noncode/ *IDH* mutant/ *ATRX* WT (n=52) are also included in the analysis for comparison.

# Supplementary figure 2

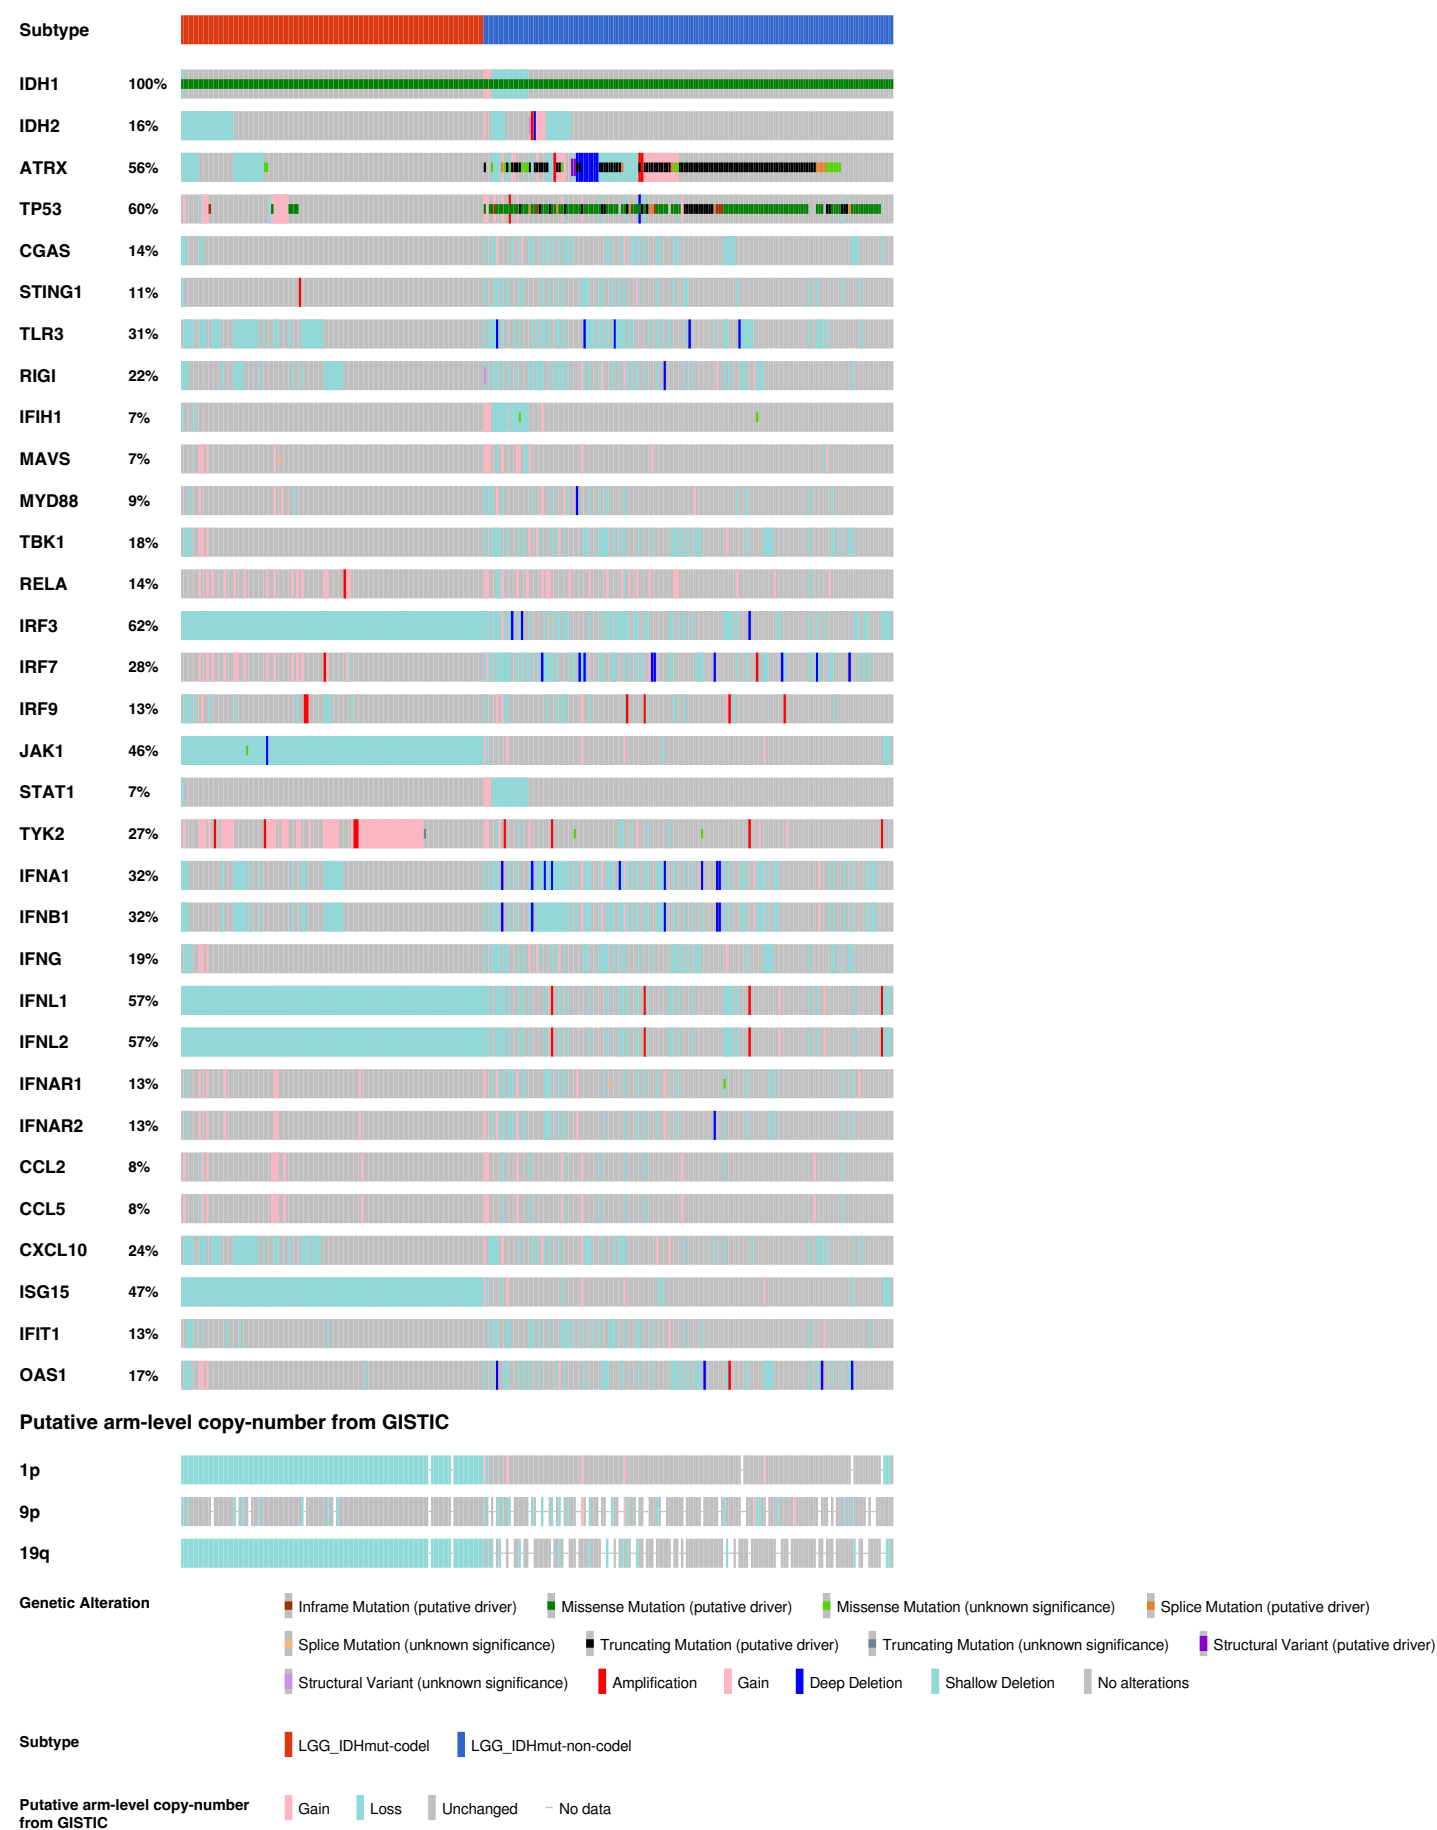



**Supplementary figure 2 – supporting figures 1a and b. *IDH*-mut astrocytomas exhibit lower frequency of genetic alterations in immune-related genes compared to *IDH*-mut oligodendrogliomas.**

Oncoprint output from cBioportal for the [CNS/Brain TCGA LGG PanCancer Atlas Study](#) analyzing *IDH* mutant-LGGs for mutation status of indicated genes. Datasets from *IDH*-mutant 1p/19q code1 subtype are compared with *IDH*-mutant 1p/19q noncode1 subtype.

# Supplementary figure 3

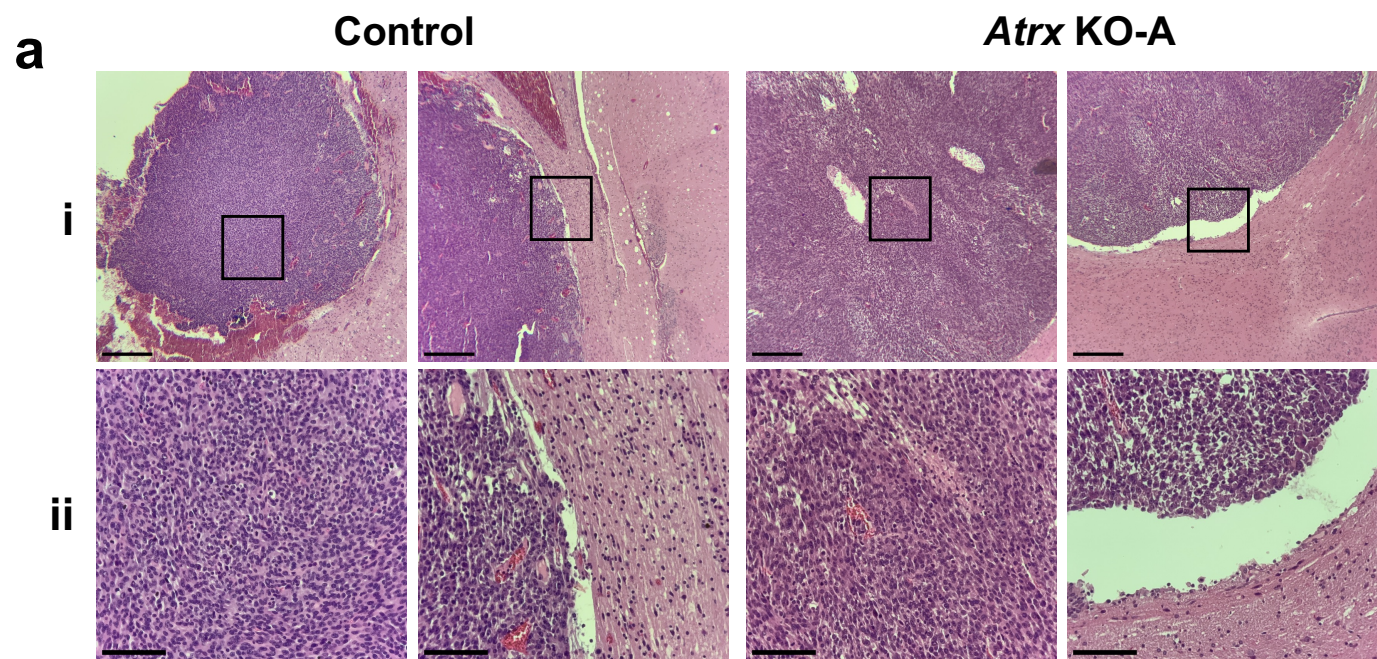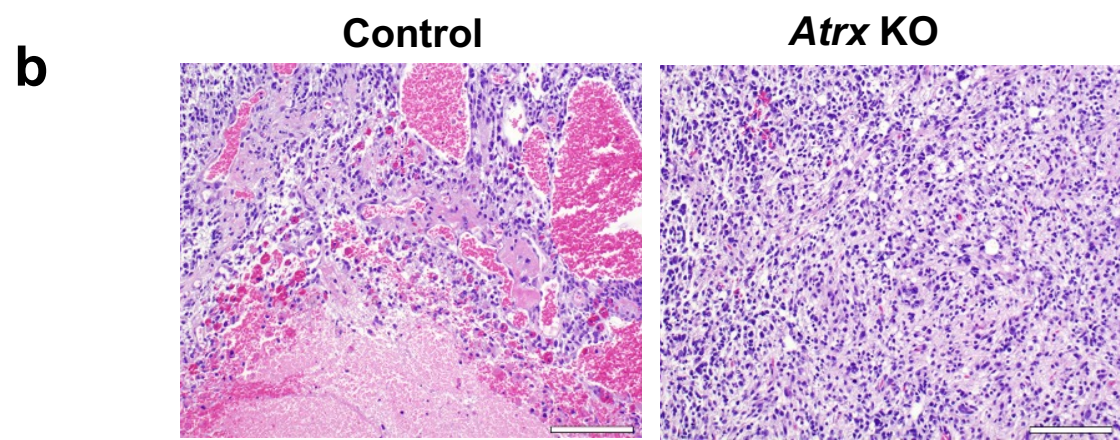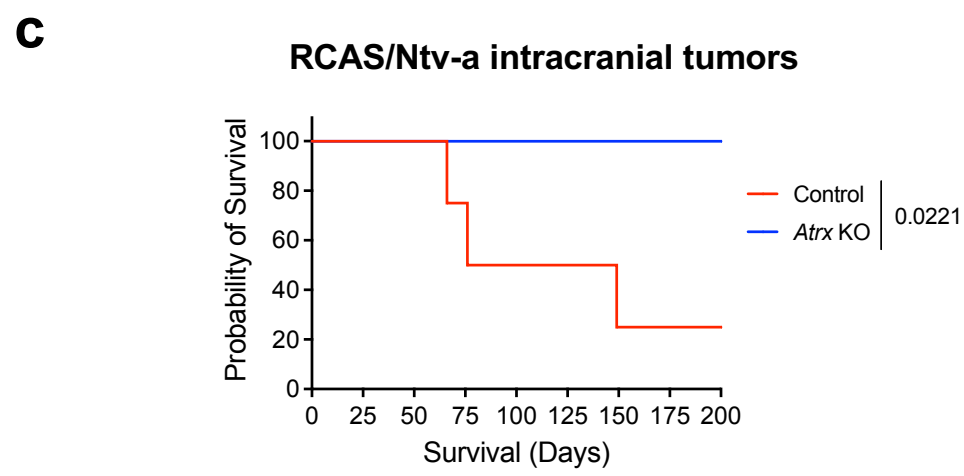



# Supplementary figure 3

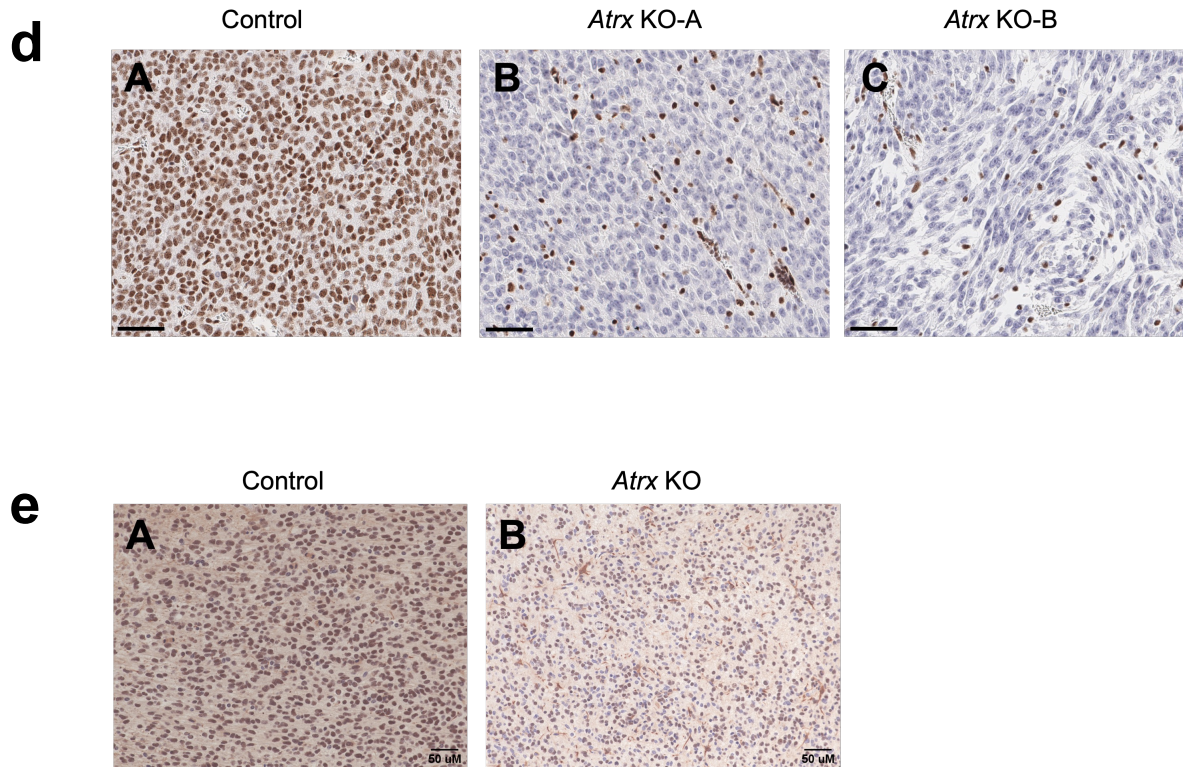

## Supplementary figure 3 – supporting figures 2a and b. Histology from *Atrx*<sup>WT</sup> and *Atrx*-KO CT2A and RCAS/Ntv-a tumors.

(a) H&E staining performed on end-stage CT2A CRISPR control (*Atrx*<sup>WT</sup>) and *Atrx* KO-A tumors. Row i represents images taken using a 4x objective (Scale bar: 400μm); Row ii represents images taken using a 20X objective of the insets shown in row i. (Scale bar: 100μm). Number of brains subjected to IHC per group: n=3 for CRISPR control and *Atrx* KO-A. (b) H&E staining performed on end-stage *Atrx*<sup>+/+</sup> (Control) or *Atrx*<sup>-/-</sup> (*Atrx* KO) tumors. Scale bar: 100μm. Number of brains subjected to IHC per group: n=3 for Control and *Atrx* KO. (c) Kaplan Meir survival curves for C57BL/6 mice bearing intracranial RCAS/ Ntv-a *Atrx*<sup>fl/fl</sup> (*Atrx* KO) (n=5) and *Atrx*<sup>+/+</sup> (Ctrl) (n=4) tumors generated by re-injecting *Atrx*<sup>+/+</sup> (Ctrl) or *Atrx*<sup>fl/fl</sup> (*Atrx* KO) cell lines derived from the de-novo model. P-value of 0.0221 represents group comparison calculated using log-rank test. (d) Representative IHC images for ATRX expression (brown) in CT2A CRISPR Control (*Atrx*<sup>WT</sup>) (A), *Atrx* KO-A (B) and KO-B (C) end-stage tumors, with hematoxylin counter-staining (blue). Scale bar: 50μm. Number of brains subjected to IHC per group: n=3 for CRISPR control, *Atrx* KO-A and *Atrx* KO-B. (e) Representative IHC images for ATRX expression in RCAS/Ntv-a *Atrx*<sup>WT</sup> (A) and *Atrx* KO (B) end-stage tumors. Scale bar: 50μm. Number of brains subjected to IHC per group: n=3 for Control and *Atrx* KO. Source data are provided as a Source Data file.

# Supplementary figure 4

**a**

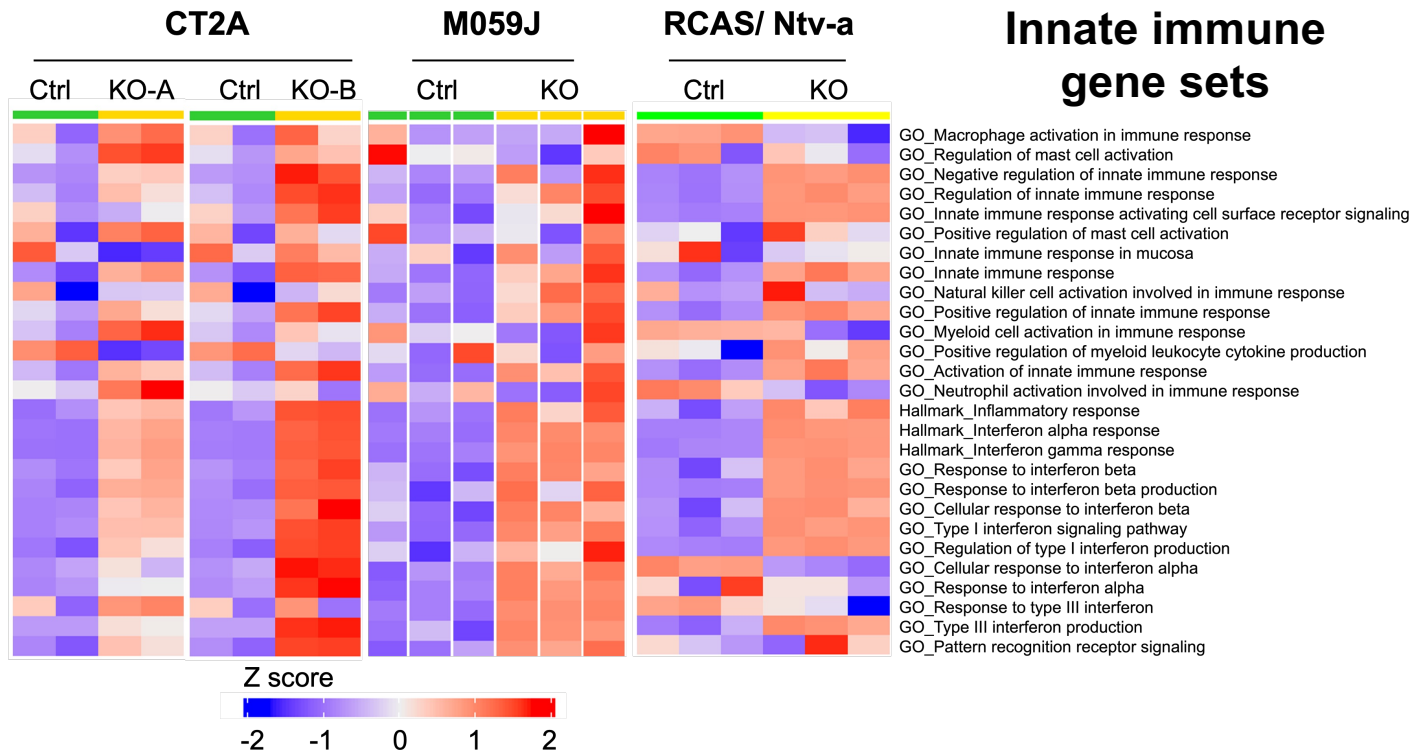

**b**

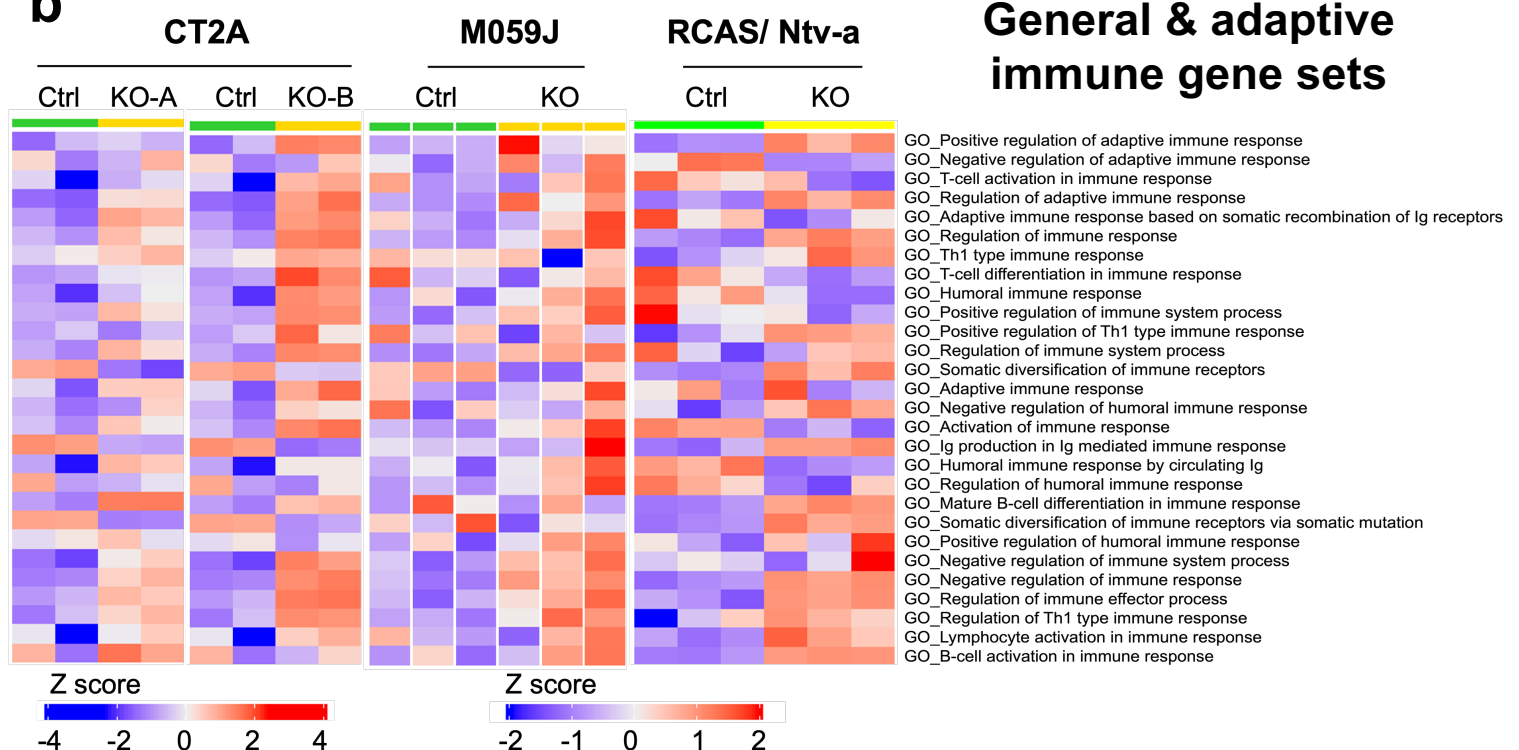

**Supplementary figure 4 – supporting figure 2d. ATRX loss is associated with a pro-inflammatory signaling.**

(a, b) Heatmap from ssGSEA showing enrichment for various innate immune-related (a) and general and adaptive immune-related (b) gene sets in CT2A *Atrx* KO-A and KO-B clones, M059J *ATRX* KO cells and RCAS/Ntv-a *Atrx* KO compared to their respective *ATRX*<sup>WT</sup> counterparts. n=2 technical replicates per cell line for CT2A expression data; n= 3 technical replicates per cell line for M059J expression data; n=3 biological replicates (3 consecutive cell passages) per cell line for RCAS/Ntv-a cell line expression data.

# Supplementary figure 5

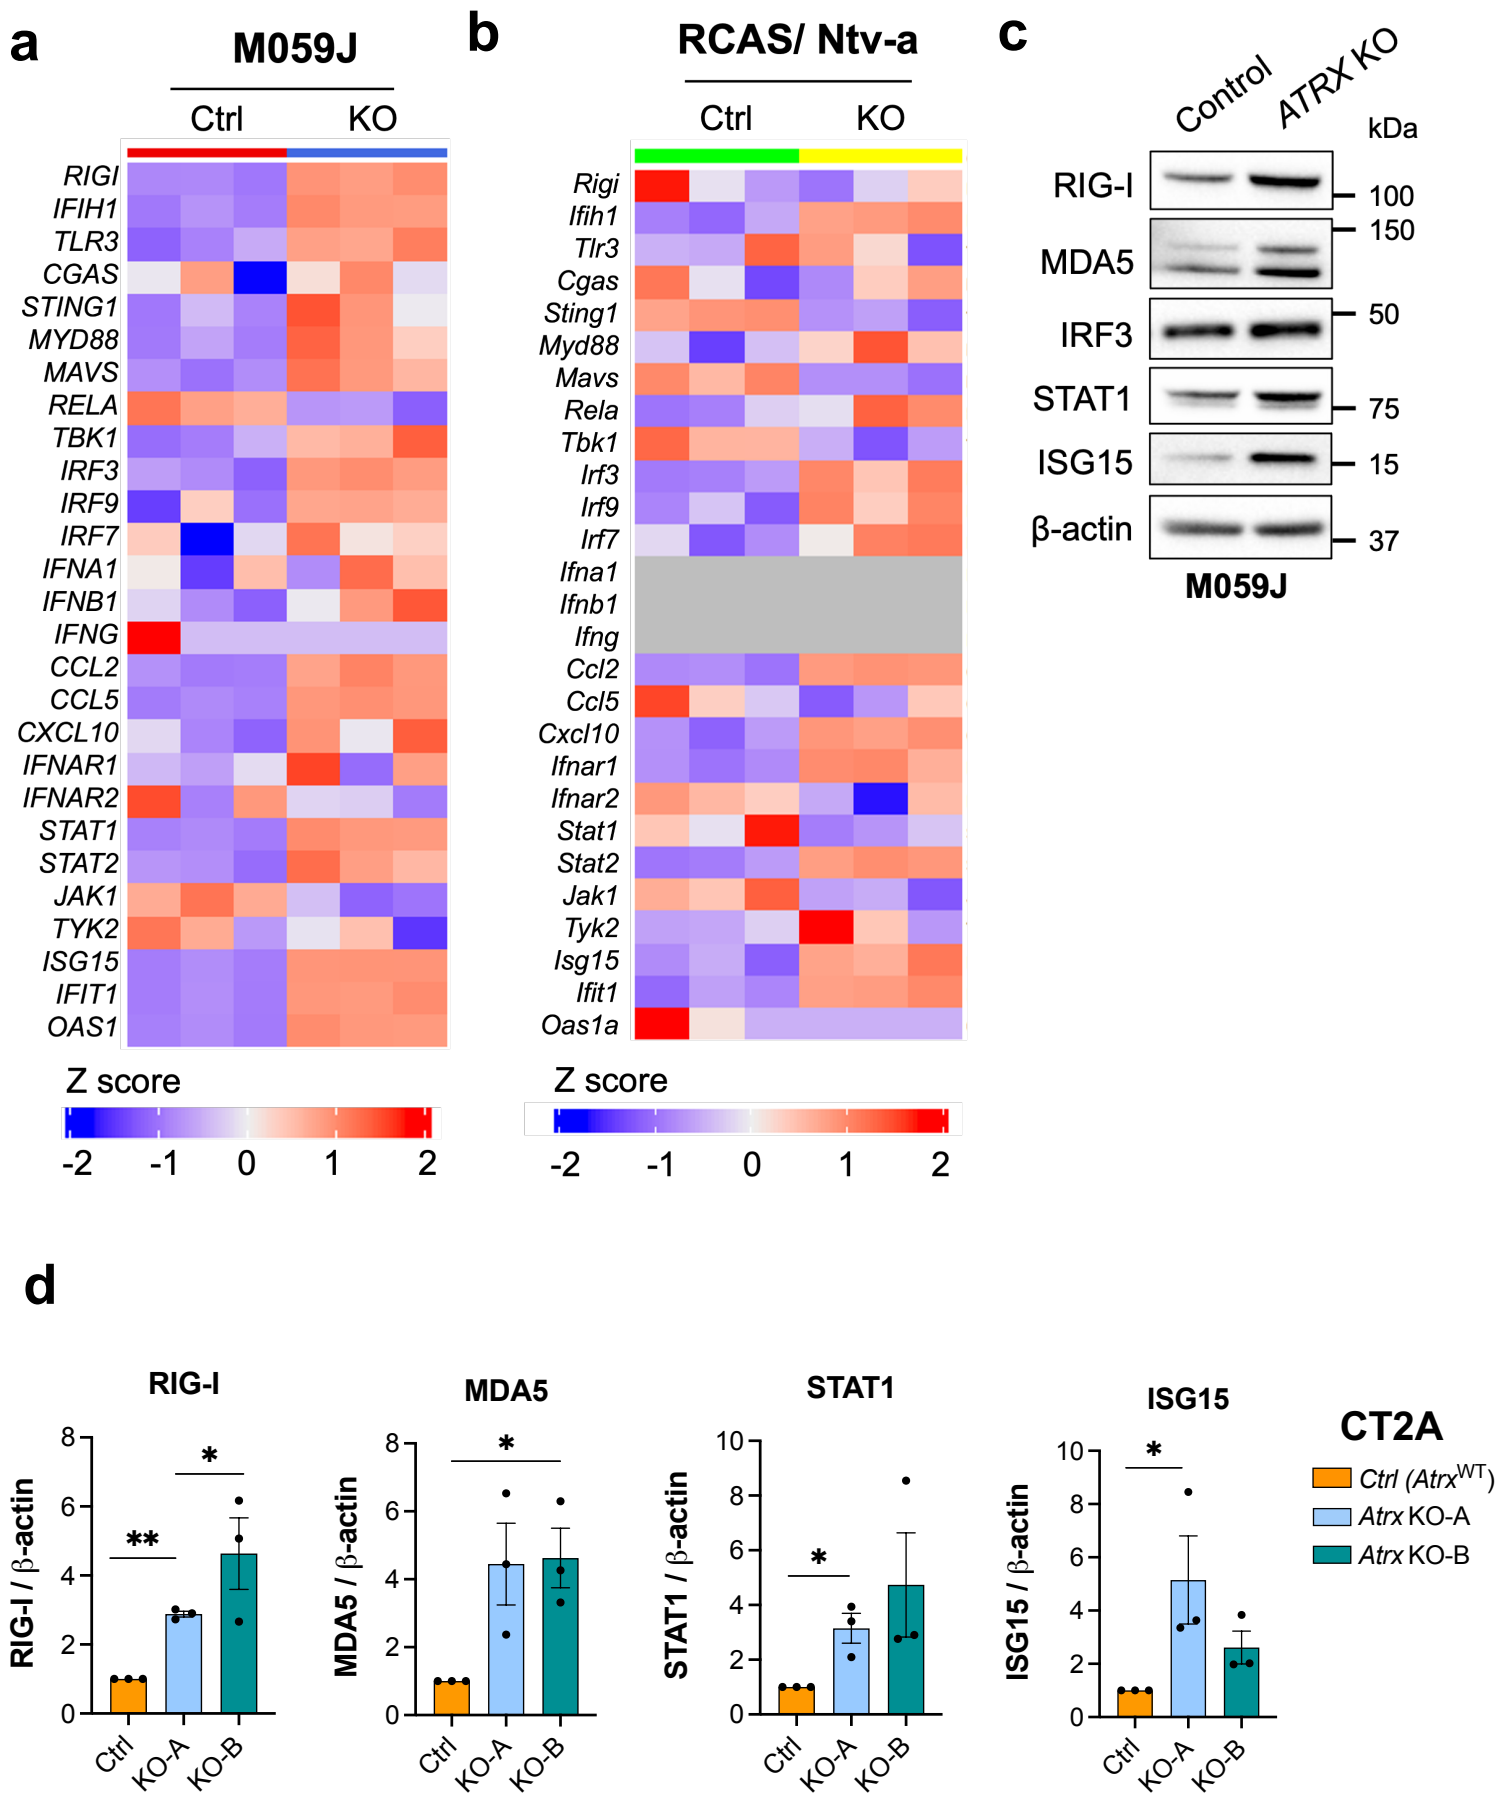

## Supplementary figure 5

e

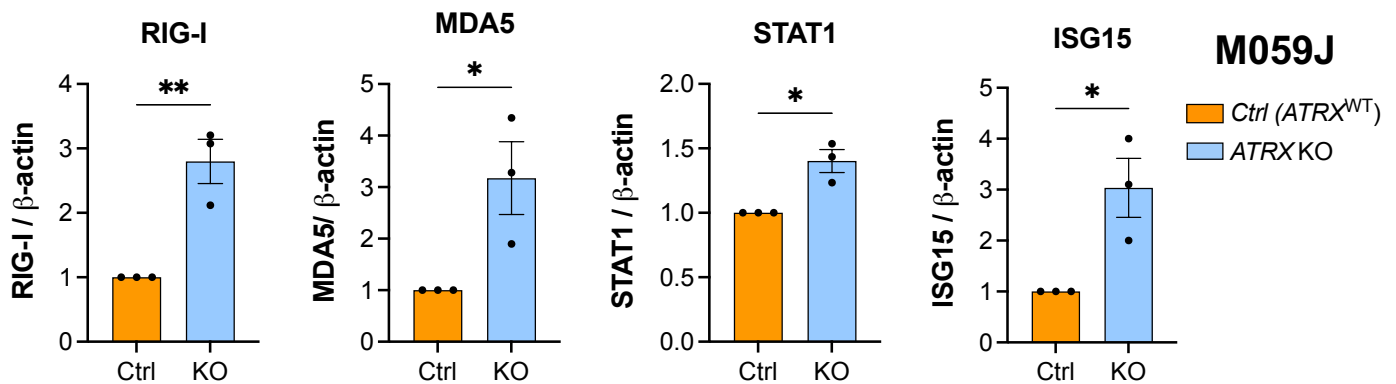

### Supplementary figure 5 – supporting figures 3a and b. ATRX loss is associated with increased baseline gene and protein expression.

(a, b) Heatmap showing differential expression of immune-related genes in M059J CRISPR control (Ctrl) and ATRX KO cells (a) and RCAS/Ntv-a *Atrx*<sup>+/+</sup> (Ctrl) and *Atrx*<sup>-/-</sup> (KO) cells (b). n= 3 technical replicates per cell line for M059J expression data; n=3 consecutive cell passages per cell line for RCAS/Ntv-a cell line expression data. (c) Representative western blot using lysates from M059J CRISPR ctrl (Ctrl) and ATRX KO cells (KO) screened for proteins involved in innate immune signaling. β-actin serves as the loading control. N=3 independent experiments. Densitometry values are indicated in Supplementary Fig. 5e. (d) Densitometry values for proteins that are induced upon ATRX depletion in CT2A cell lines shown in Fig. 3b and two other independent experiments (n=3). Data are presented as mean ± SEM and are normalized to β-actin loading control and *Atrx*<sup>WT</sup> for every sample. Asterisks denote significant p-values from one-way ANOVA with Dunnett's post hoc test. (\*: p<0.05; \*\*: p<0.01; \*\*\*: p<0.001). (e) Densitometry values for proteins that are induced upon ATRX depletion in M059J cell lines shown in Supplementary Fig. 5c and two other independent experiments (n=3). Data are presented as mean ± SEM and are normalized to β-actin loading control and ATRX<sup>WT</sup> for every sample. Asterisks denote significant p-values from unpaired, two-tailed Student's t-test (\*: p<0.05; \*\*: p<0.01; \*\*\*: p<0.001). Source data are provided as a Source Data file.

# Supplementary figure 6

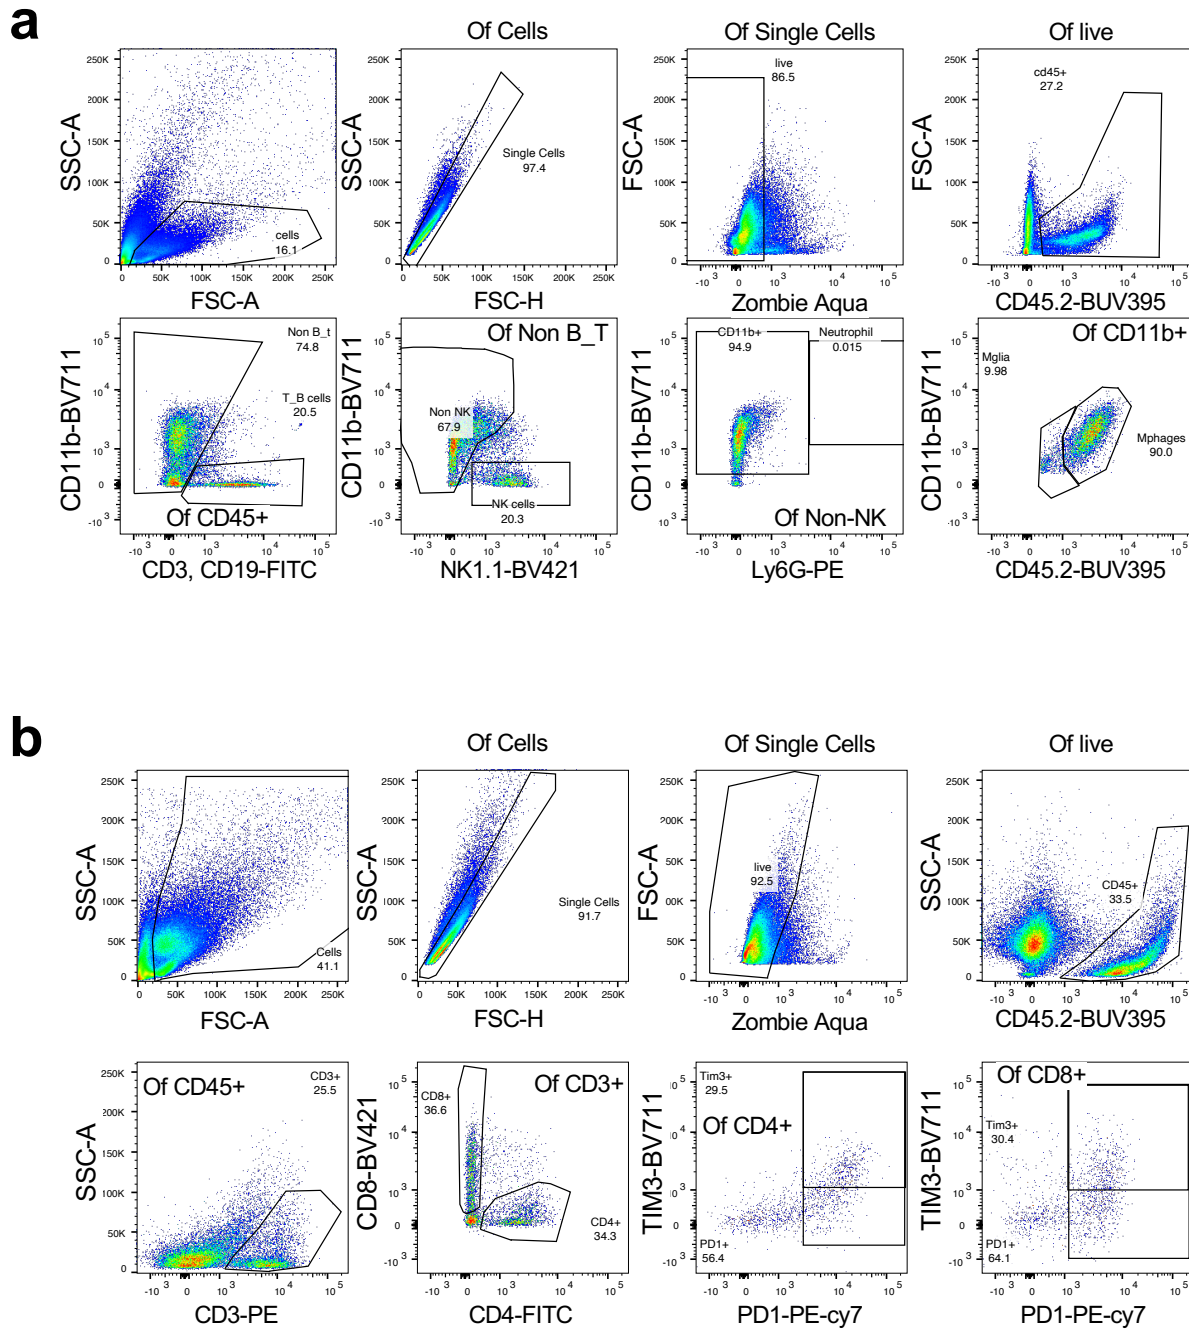

**Supplementary figure 6 – supporting figure 4a. Representative gating strategy for analysis of *Atrx* KO tumors.**

Gating strategy for analysis of tumor associated myeloid (a) and T cells (b) along with relevant phenotypes by flow cytometry.



## Supplementary figure 7

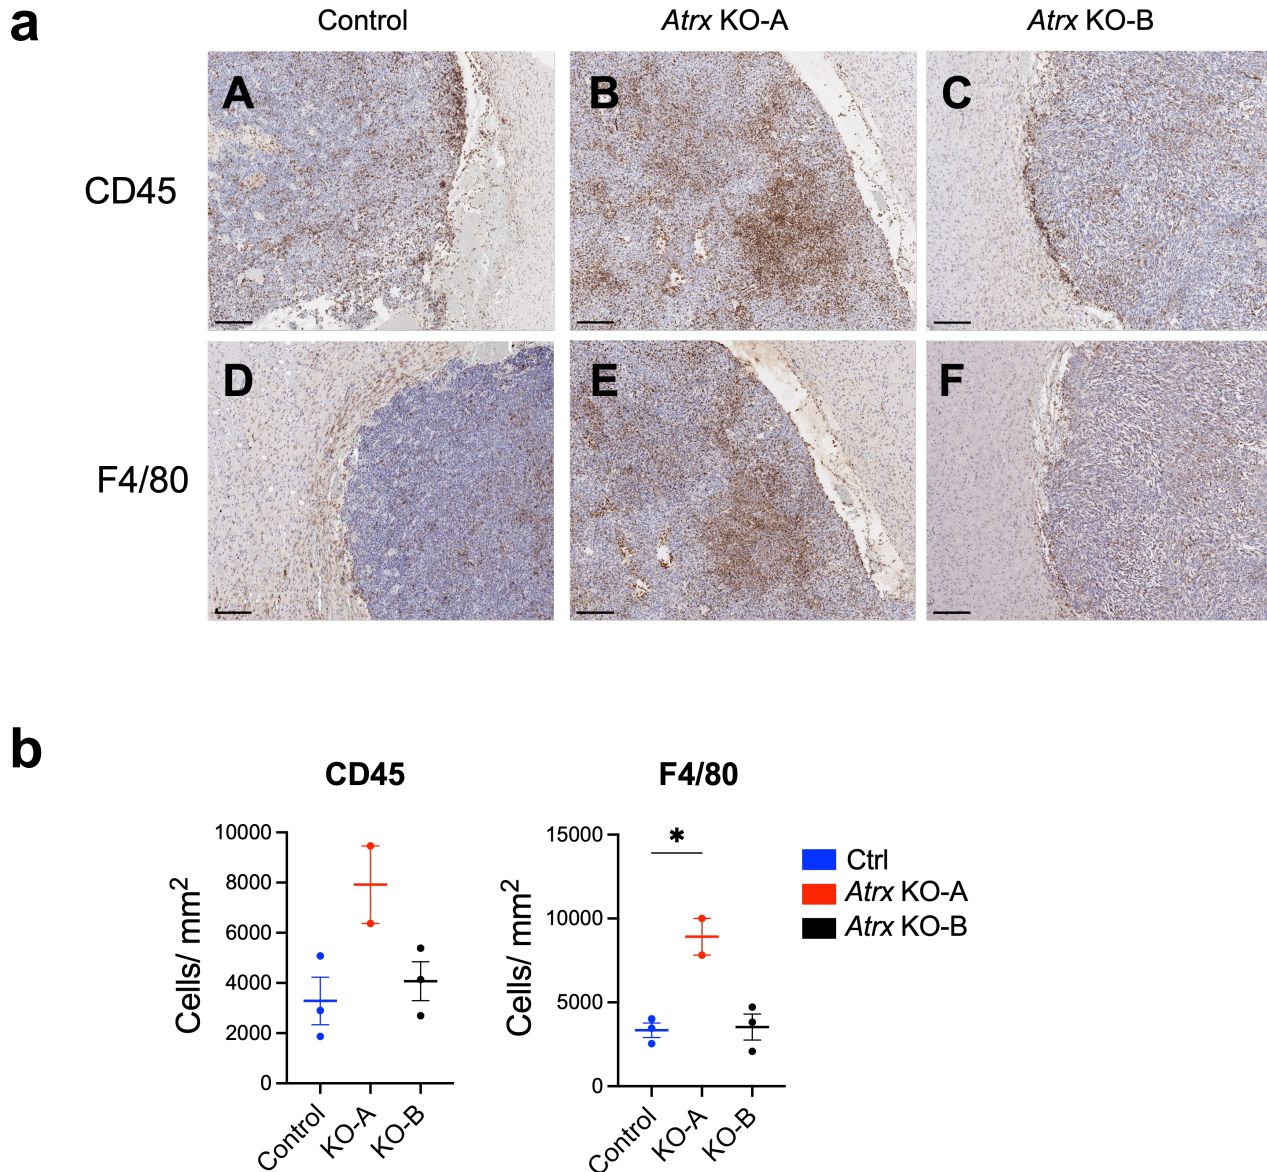

### Supplementary figure 7 – supporting figure 4b. Immune infiltration in CT2A *Atrx*-KO tumors.

(a) Representative low magnification IHC images for CD45 (A, B, C) and F4/80 (D, E, F) expression (brown) in CT2A CRISPR Control (*Atrx*<sup>WT</sup>) (A, D), *Atrx* KO-A (B, E) and KO-B (C, F) tumors, with hematoxylin counter-staining (blue). Scale bar: 200µm. Number of brains subjected to IHC per group: CRISPR Control – n=3; *Atrx* KO-A – n=2; *Atrx* KO-B – n=3. (b) Quantitation of CD45 and F4/80 expression in CT2A CRISPR control and *Atrx* KO tumors (N: Control – 3, *Atrx* KO-A – 2, *Atrx* KO-B – 3). Data are presented as mean ± SEM. Asterisks denote significant p-values from unpaired two-tailed Student's t-test (\*: p<0.05). Source data are provided as a Source Data file.

## Supplementary figure 8

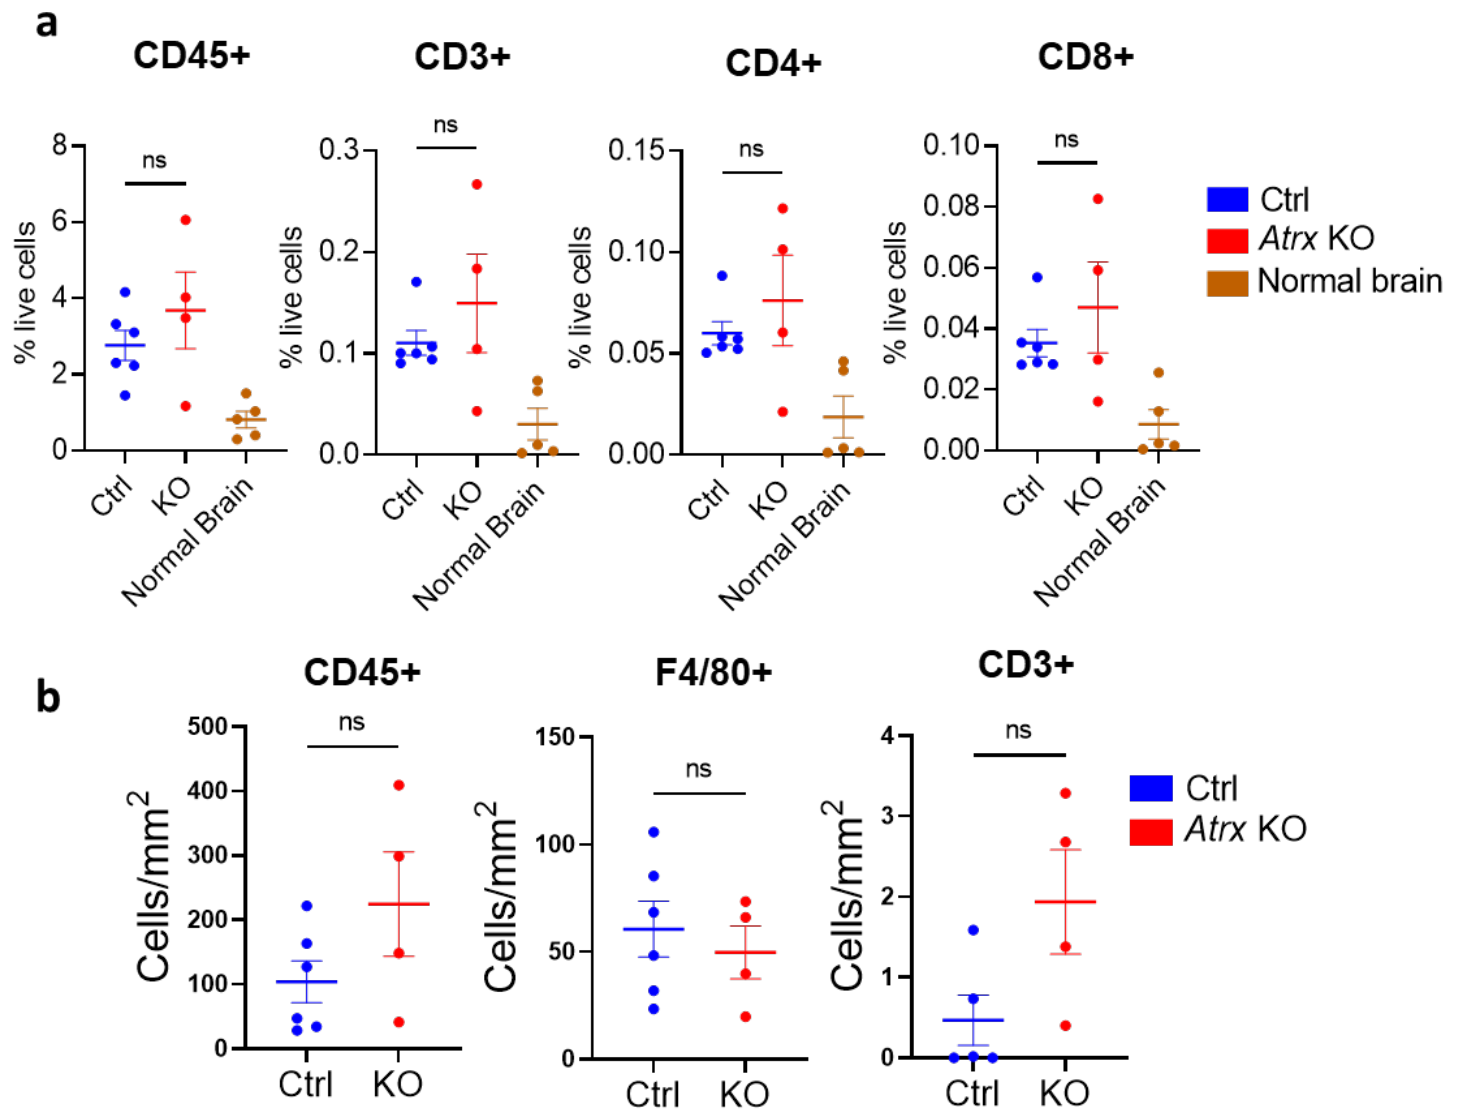

### Supplementary figure 8 – supporting figure 4c. ATRX deficiency leads to increased immune cell infiltration.

(a) Flow cytometry analysis of RCAS/Ntv-a control (*Atrx*<sup>WT</sup>) and *Atrx* KO tumor-bearing hemispheres harvested 14 days post-intracranial implantation, showing percent live cell density of CD45+ leukocytes, CD3+, CD4+, and CD8+ T-cells. Gating strategy is provided in Supplementary Fig. 6. n=6 for control; n=4 for *Atrx* KO; n=5 for normal brain. Data are presented as mean  $\pm$  SEM. Statistics are the result of an unpaired two-tailed Student's t-test comparing control and *Atrx* KO samples. (b) Blinded quantitation of IHC staining for CD45, F4/80 and CD3 staining is displayed. n=6 for control; n=4 for *Atrx* KO. Data are presented as mean  $\pm$  SEM. Statistics are the result of an unpaired two-tailed Student's t-test comparing control and *Atrx* KO samples. Source data are provided as a Source Data file.

## Supplementary figure 9

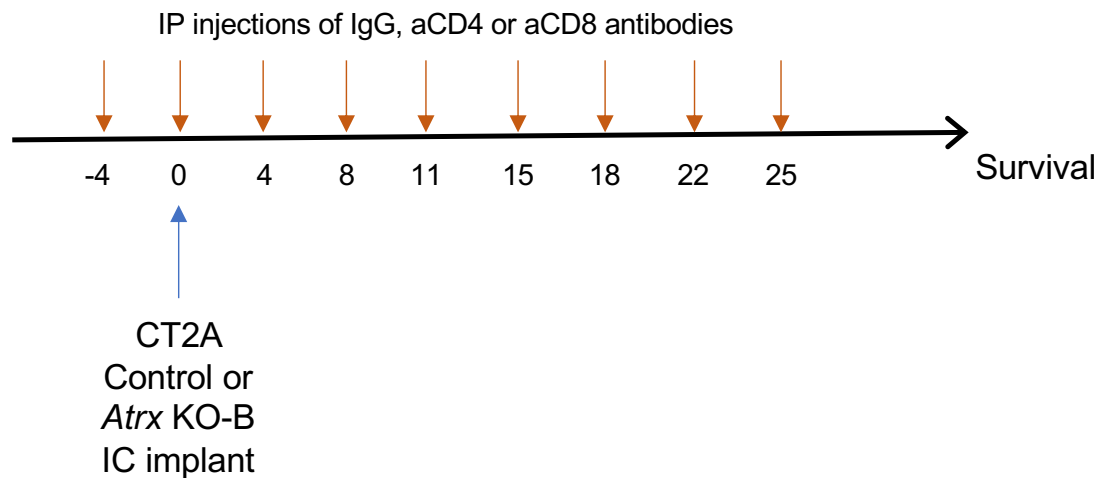

**Supplementary Figure 9 – supporting figures 4d-e:** Schema showing timeline of intraperitoneal (IP) injections of isotype control IgG, anti-CD4 and anti-CD8 antibodies in C57BL/6 mice bearing CT2A CRISPR control or *Atrx* KO-B tumors. Mice were dosed every 3 or 4 days till they exhibited neurological symptoms or loss in body weight, at which point they were sacrificed.

## Supplementary figure 10

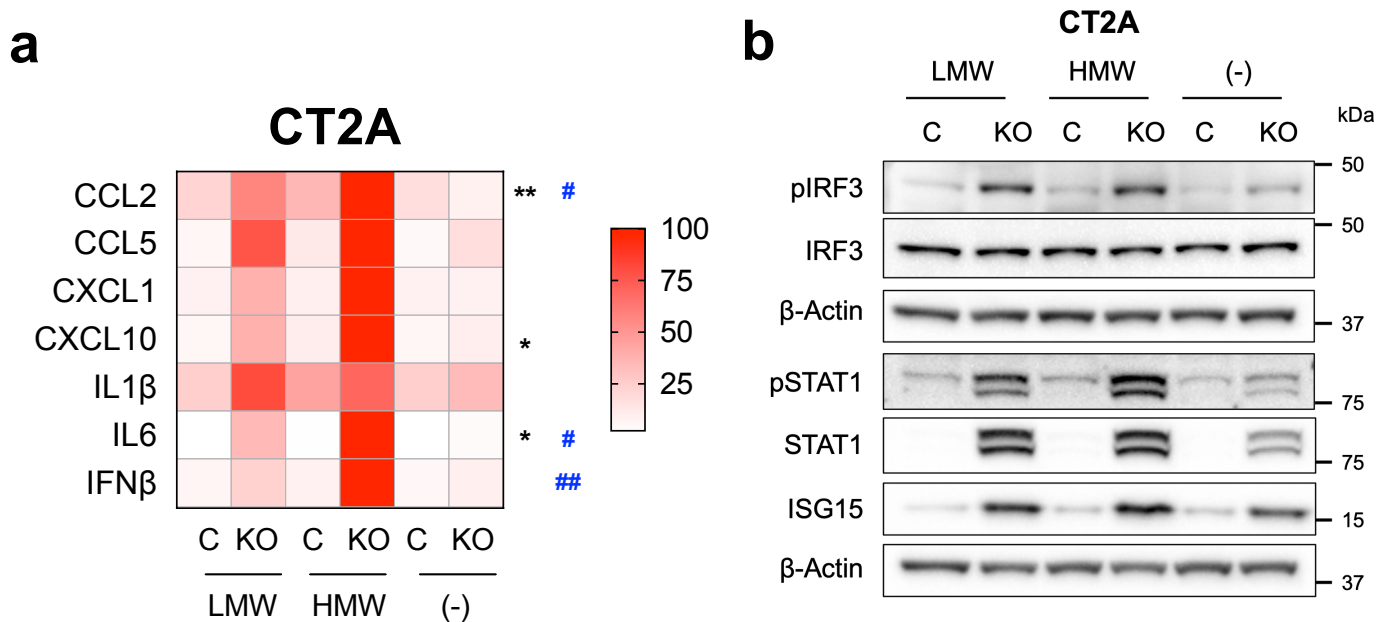

### Supplementary figure 10 – supporting figures 6a and 6d. ATRX depletion sensitizes cells to poly(I:C), a dsRNA agonist.

(a) Cytokine levels in conditioned media from CT2A CRISPR control and *Atrx* KO-B cells, treated with 10µg/ml poly(I:C) LMW or HMW for 24hrs. Supernatant cytokines were analyzed by cytokine bead arrays for antiviral and proinflammatory cytokines. For heatmap generation, maximum values for each cytokine were set to 100%. Only cytokines and signaling proteins with observed induction after treatment with poly(I:C) are included. N=3 independent experiments. Asterisks & hashtags denote significant one-way ANOVA with Sidak's post-hoc test comparing both poly(I:C) LMW (\*) and poly(I:C) HMW (#) between *Atrx*-KO and CRISPR control cell lines (\*, #: p<0.05; \*\*, ##: p<0.01; \*\*\*, ###: p<0.0001). Only cytokines and signaling proteins with observed induction after treatment with poly(I:C) are included.

(b) Representative Western blots using lysates from CT2A CRISPR control and *Atrx* KO-B cells treated with 10µg/ml poly(I:C) LMW or HMW for 4hrs or 24hrs, screened for pIRF3/IRF3, pSTAT1/STAT1 and ISG15 involved in innate immune signaling. β-actin serves as the loading control. N=3 independent experiments. Source data are provided as a Source Data file.



## Supplementary figure 11

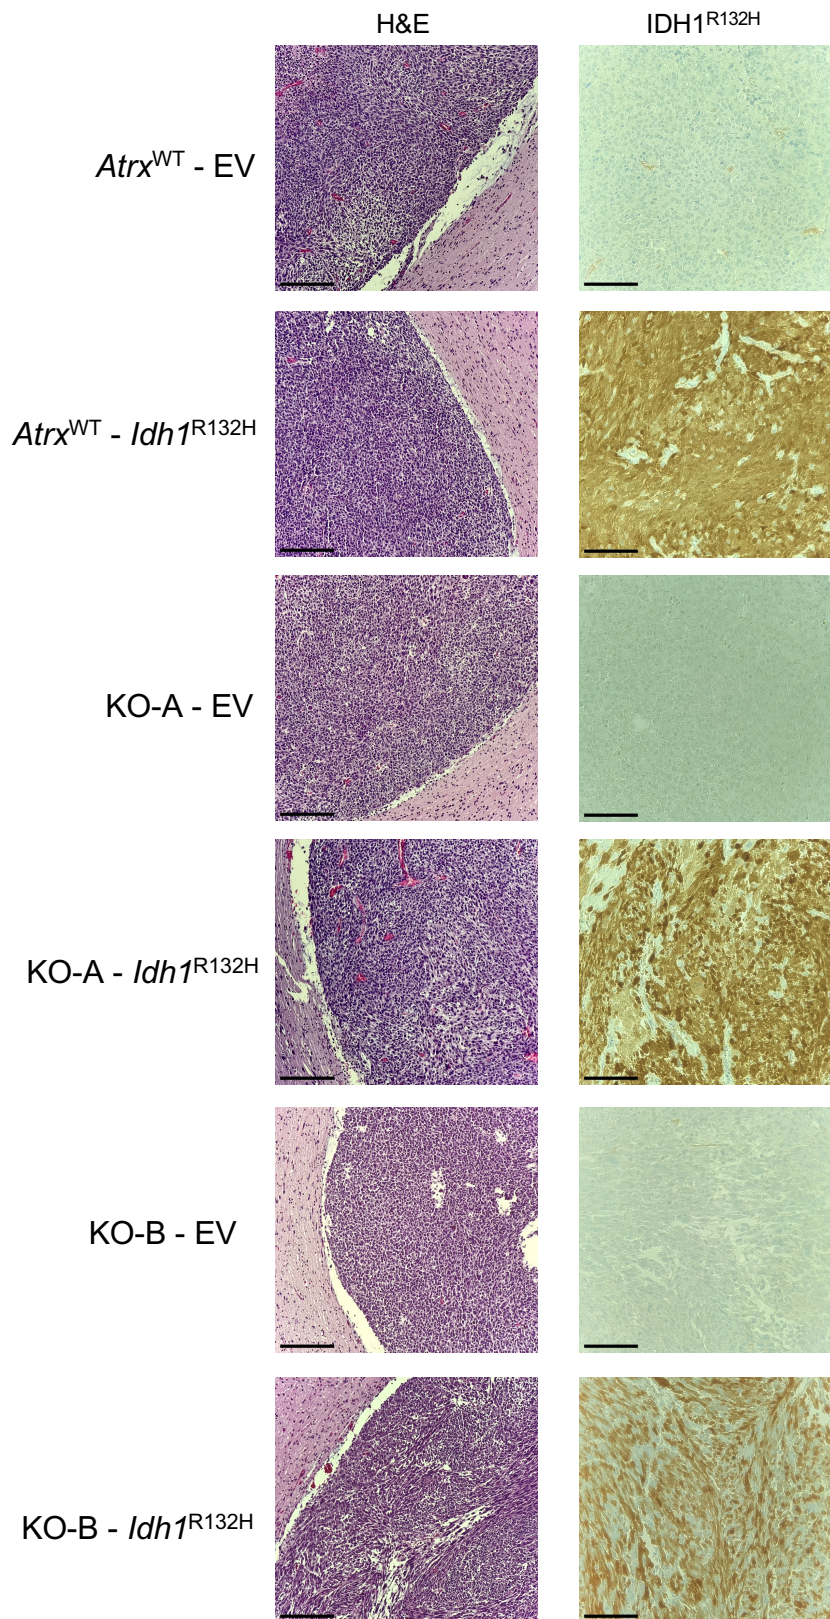

**Supplementary figure 11 – supporting figure 7d.** H&E and IDH1<sup>R132H</sup> staining of CT2A *Idh1*<sup>WT</sup> or *Idh1*<sup>R132H</sup> tumors harvested when mice exhibited neurological symptoms or were moribund. H&E images were taken using a 10X objective (Scale bar: 200µm), while IDH1<sup>R132H</sup> IHC images were taken using a 20X objective (Scale bar: 100µm).

# Supplementary figure 12

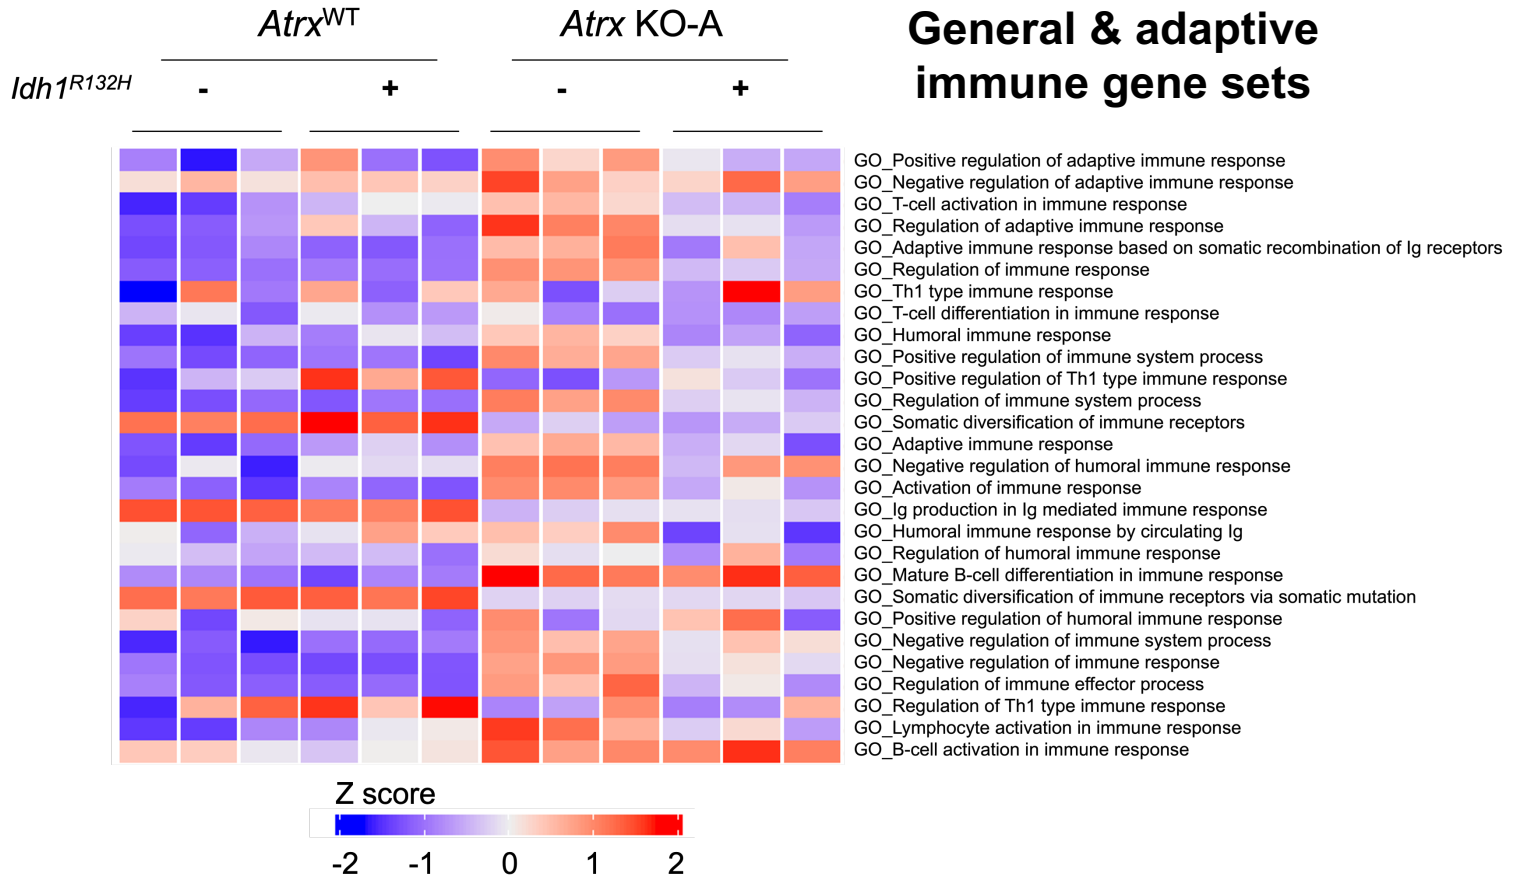

**Supplementary figure 12 – supporting figure 8a. *Idh1<sup>R132H</sup>* co-expression in *Atrx*-deficient KO-A cells dampens baseline innate gene expression.**

Heatmap from ssGSEA showing loss of enrichment of various general and adaptive immune-related GO terms in *Atrx* KO-A/ *Idh1<sup>R132H</sup>* cells compared to *Atrx* KO-A/ *Idh1<sup>WT</sup>* cells. RNA was isolated from cells cultured for 72hrs. N=3 technical replicates per cell line.

# Supplementary figure 13

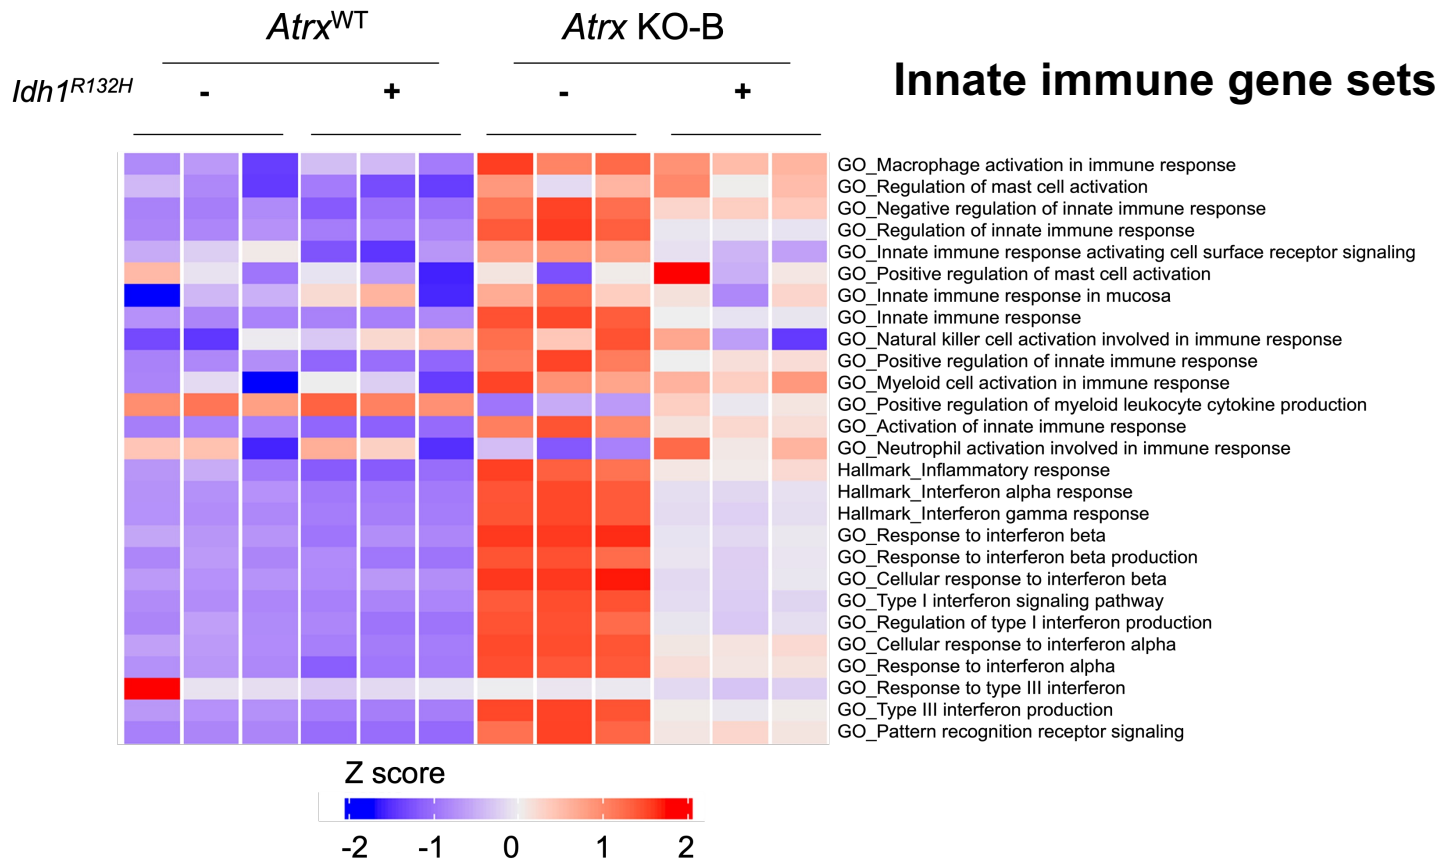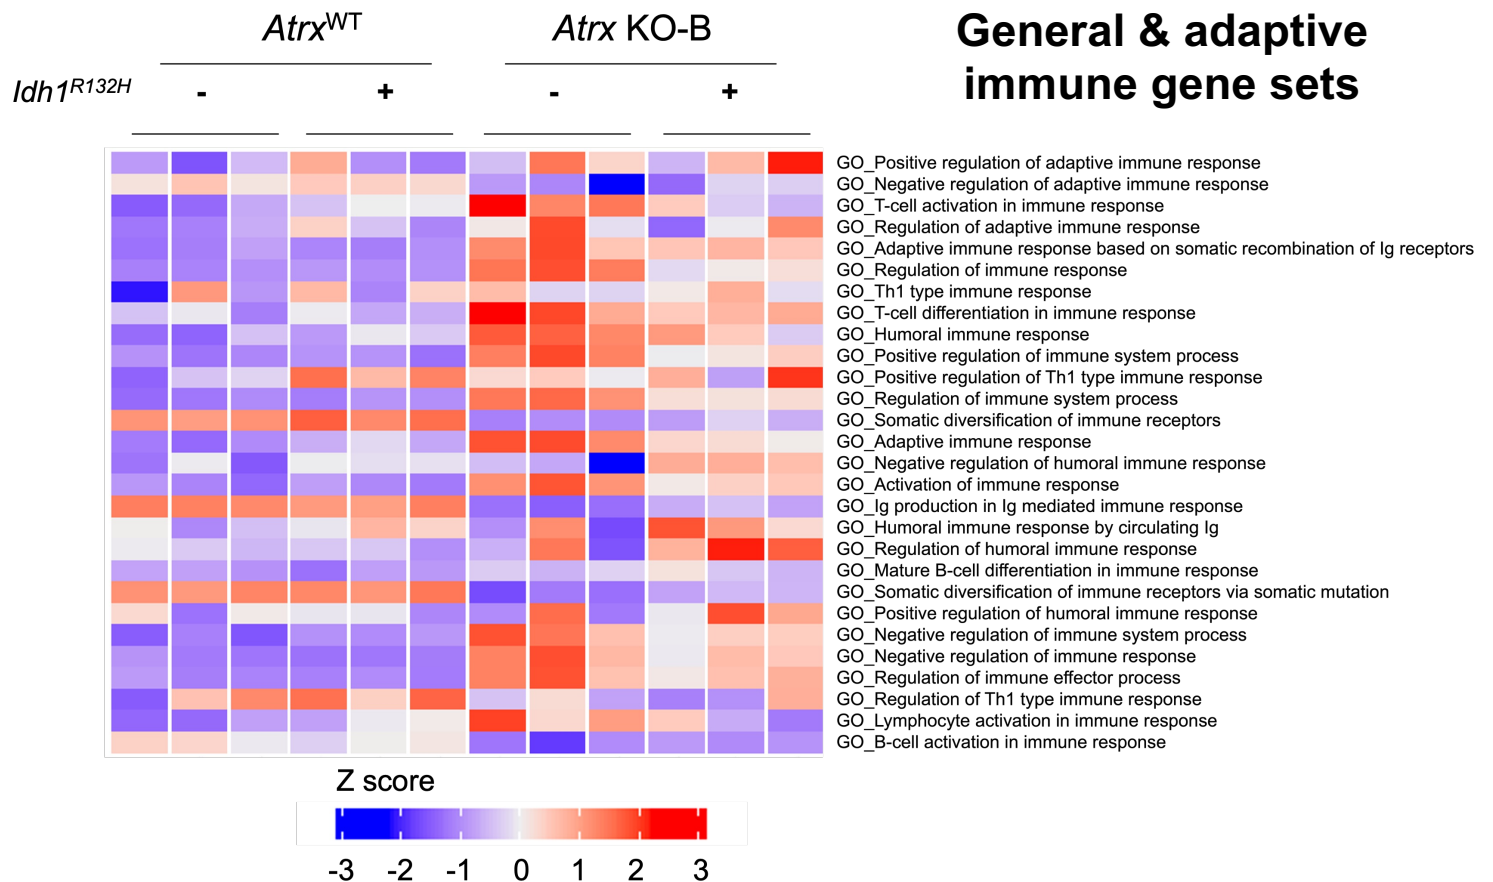

**Supplementary figure 13 – supporting figure 8a. *Idh1*<sup>R132H</sup> co-expression in *Atrx*-deficient KO-B cells dampens baseline innate gene expression.**

Heatmap from ssGSEA showing loss of enrichment of various innate and adaptive immune-related GO terms in *Atrx* KO-B/ *Idh1*<sup>R132H</sup> cells compared to *Atrx* KO-B/ *Idh1*<sup>WT</sup> cells. RNA was isolated from cells cultured for 72hrs. N=3 technical replicates per cell line.



Supplementary figure 14

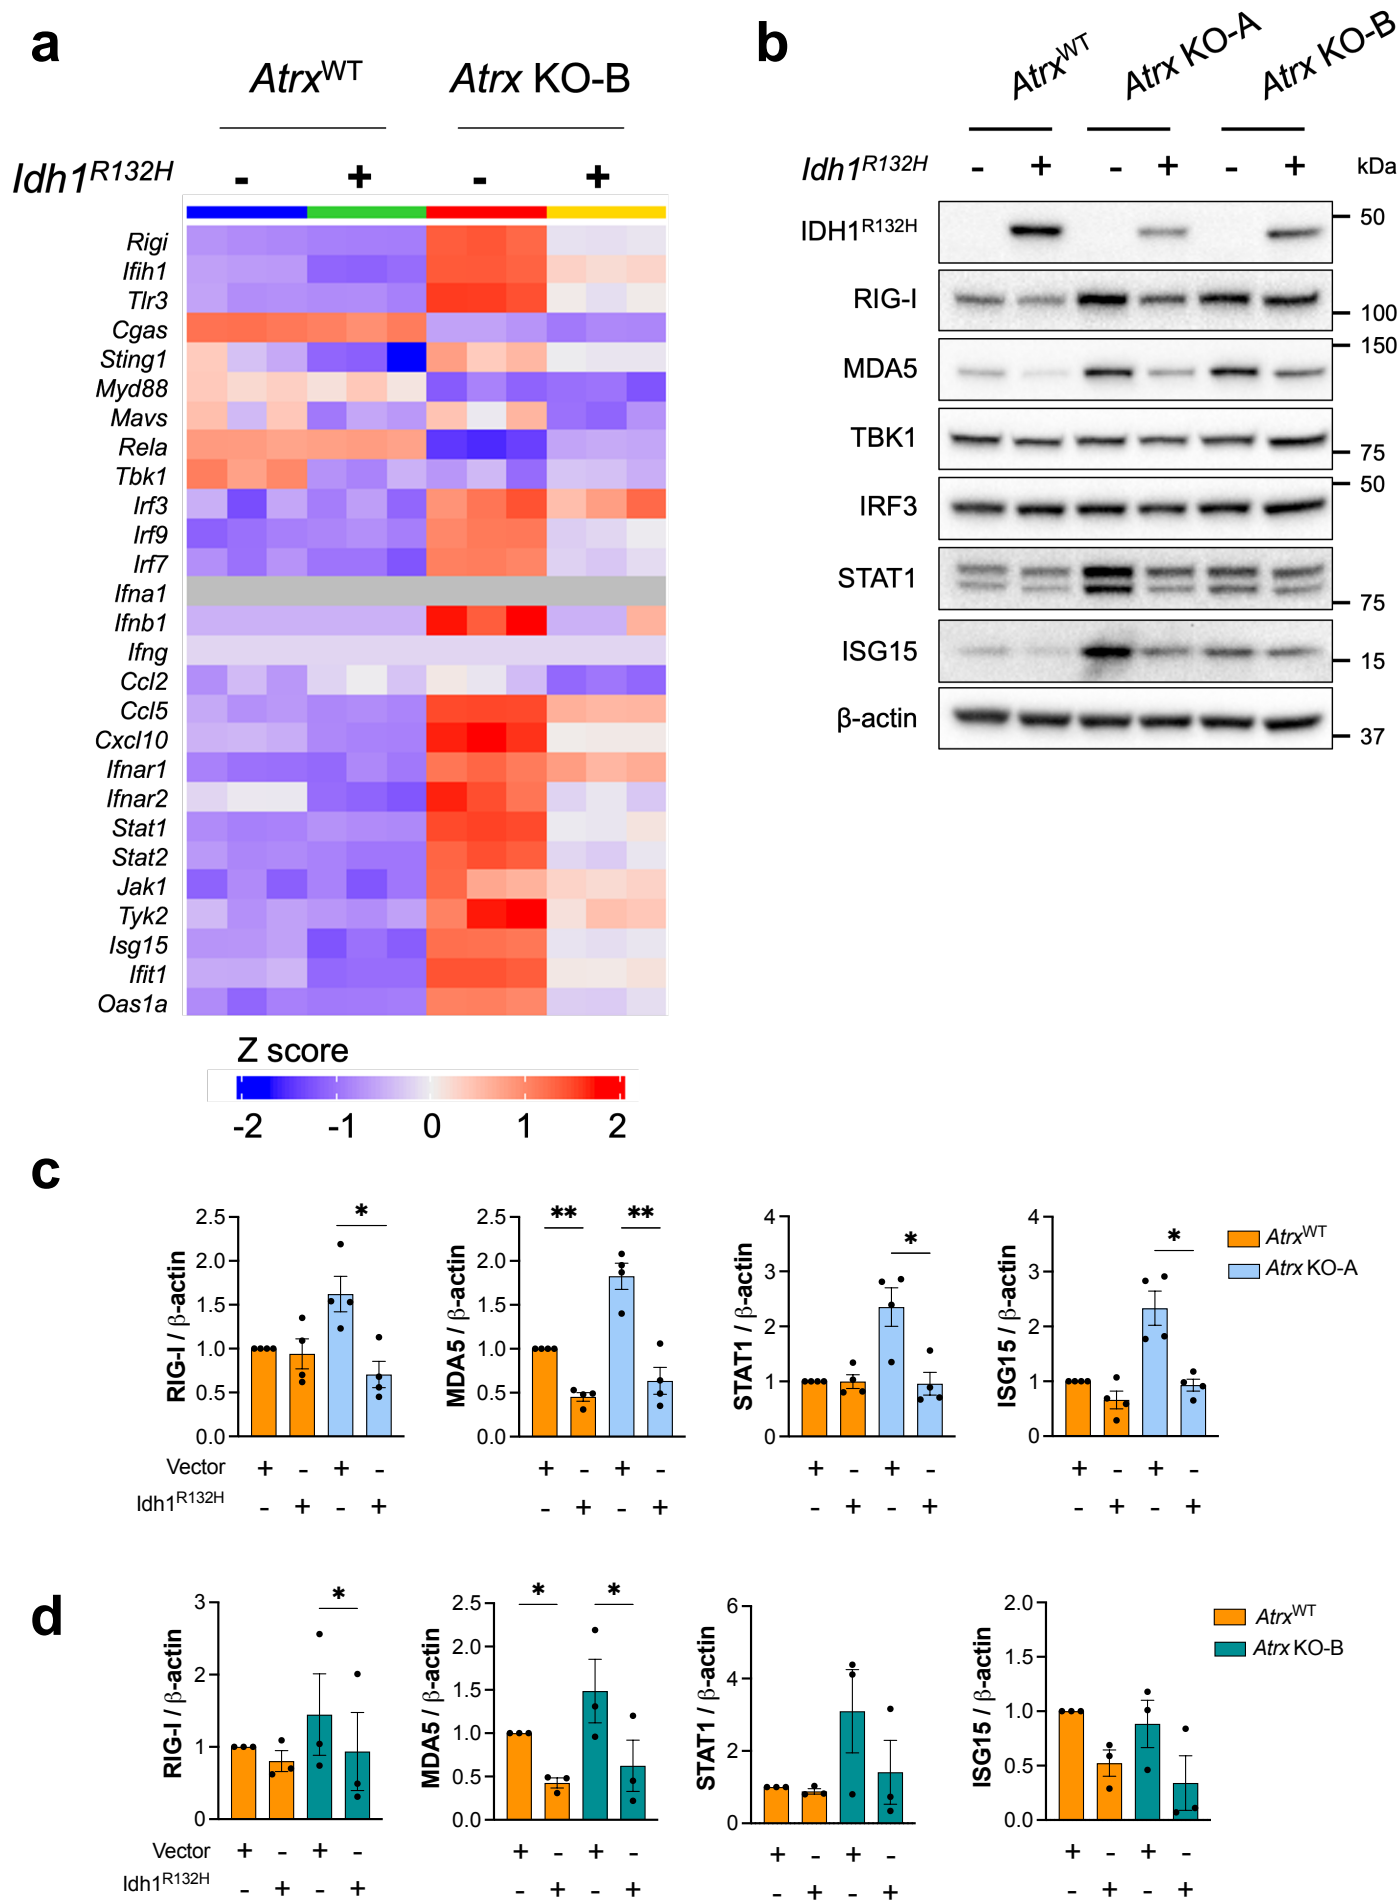

**e**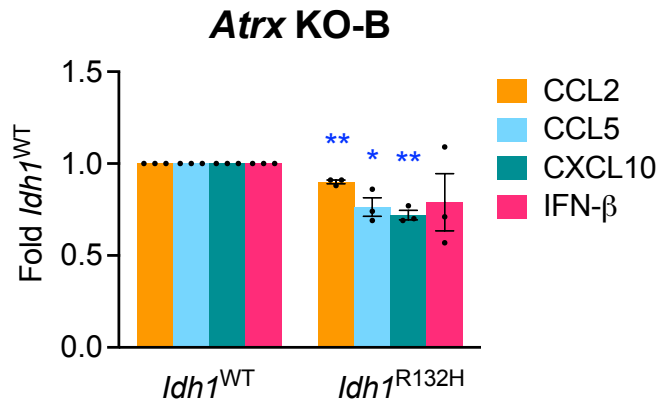

**Supplementary figure 14 – supporting figures 8b-d. IDH1<sup>R132H</sup> co-expression in ATRX-deficient cells dampens baseline innate protein expression and cytokine secretion.**

(a) Heatmap showing differential expression of immune-related genes in CT2A *Atrx*<sup>WT</sup> and *Atrx* KO-B cells with or without *Idh1*<sup>R132H</sup>. n=3 technical replicates per cell line. (b) Lysates from CT2A CRISPR control (*Atrx*<sup>WT</sup>), *Atrx* KO-A and *Atrx* KO-B cells expressing exogenous IDH1<sup>R132H</sup>, or empty vector cultured for 72hrs, were screened by Western blotting for various innate immune proteins. β-actin serves as the loading control. Representative blots are shown; N=3 independent experiments. Densitometry values are indicated in Supplementary Fig 14d. (c) Densitometry values for proteins that are modulated upon IDH1<sup>R132H</sup> co-expression in CT2A lines shown in Fig. 8c and three other independent experiments (n=4). Data are presented as mean ± SEM. (d) Densitometry values for proteins that are modulated upon IDH1<sup>R132H</sup> co-expression in CT2A lines shown in Supplementary Fig. 14b and two other independent experiments (n=3). Data are presented as mean ± SEM and are normalized to β-actin loading control and *Atrx*<sup>WT</sup>/empty vector (*Idh1*<sup>WT</sup>) for every sample. Asterisks in S14c and S14d denote significant p-values from one-way ANOVA with Sidak's post hoc test. (\*: p<0.05; \*\*: p<0.01; \*\*\*: p<0.001). (e) Conditioned media from CT2A *Atrx* KO-B cells expressing exogenous IDH1<sup>R132H</sup> or empty vector cultured for 72hrs was assayed for antiviral and proinflammatory cytokines using a Legendplex assay kit. Data indicates fold change values normalized to corresponding *Idh1*<sup>WT</sup> sample, shown as mean ± SEM. N=3 independent experiments. Asterisks denote significant results from unpaired two-tailed Student's t-tests. (\*: p<0.05; \*\*: p<0.01; \*\*\*: p<0.001). Source data are provided as a Source Data file.

# Supplementary figure 15

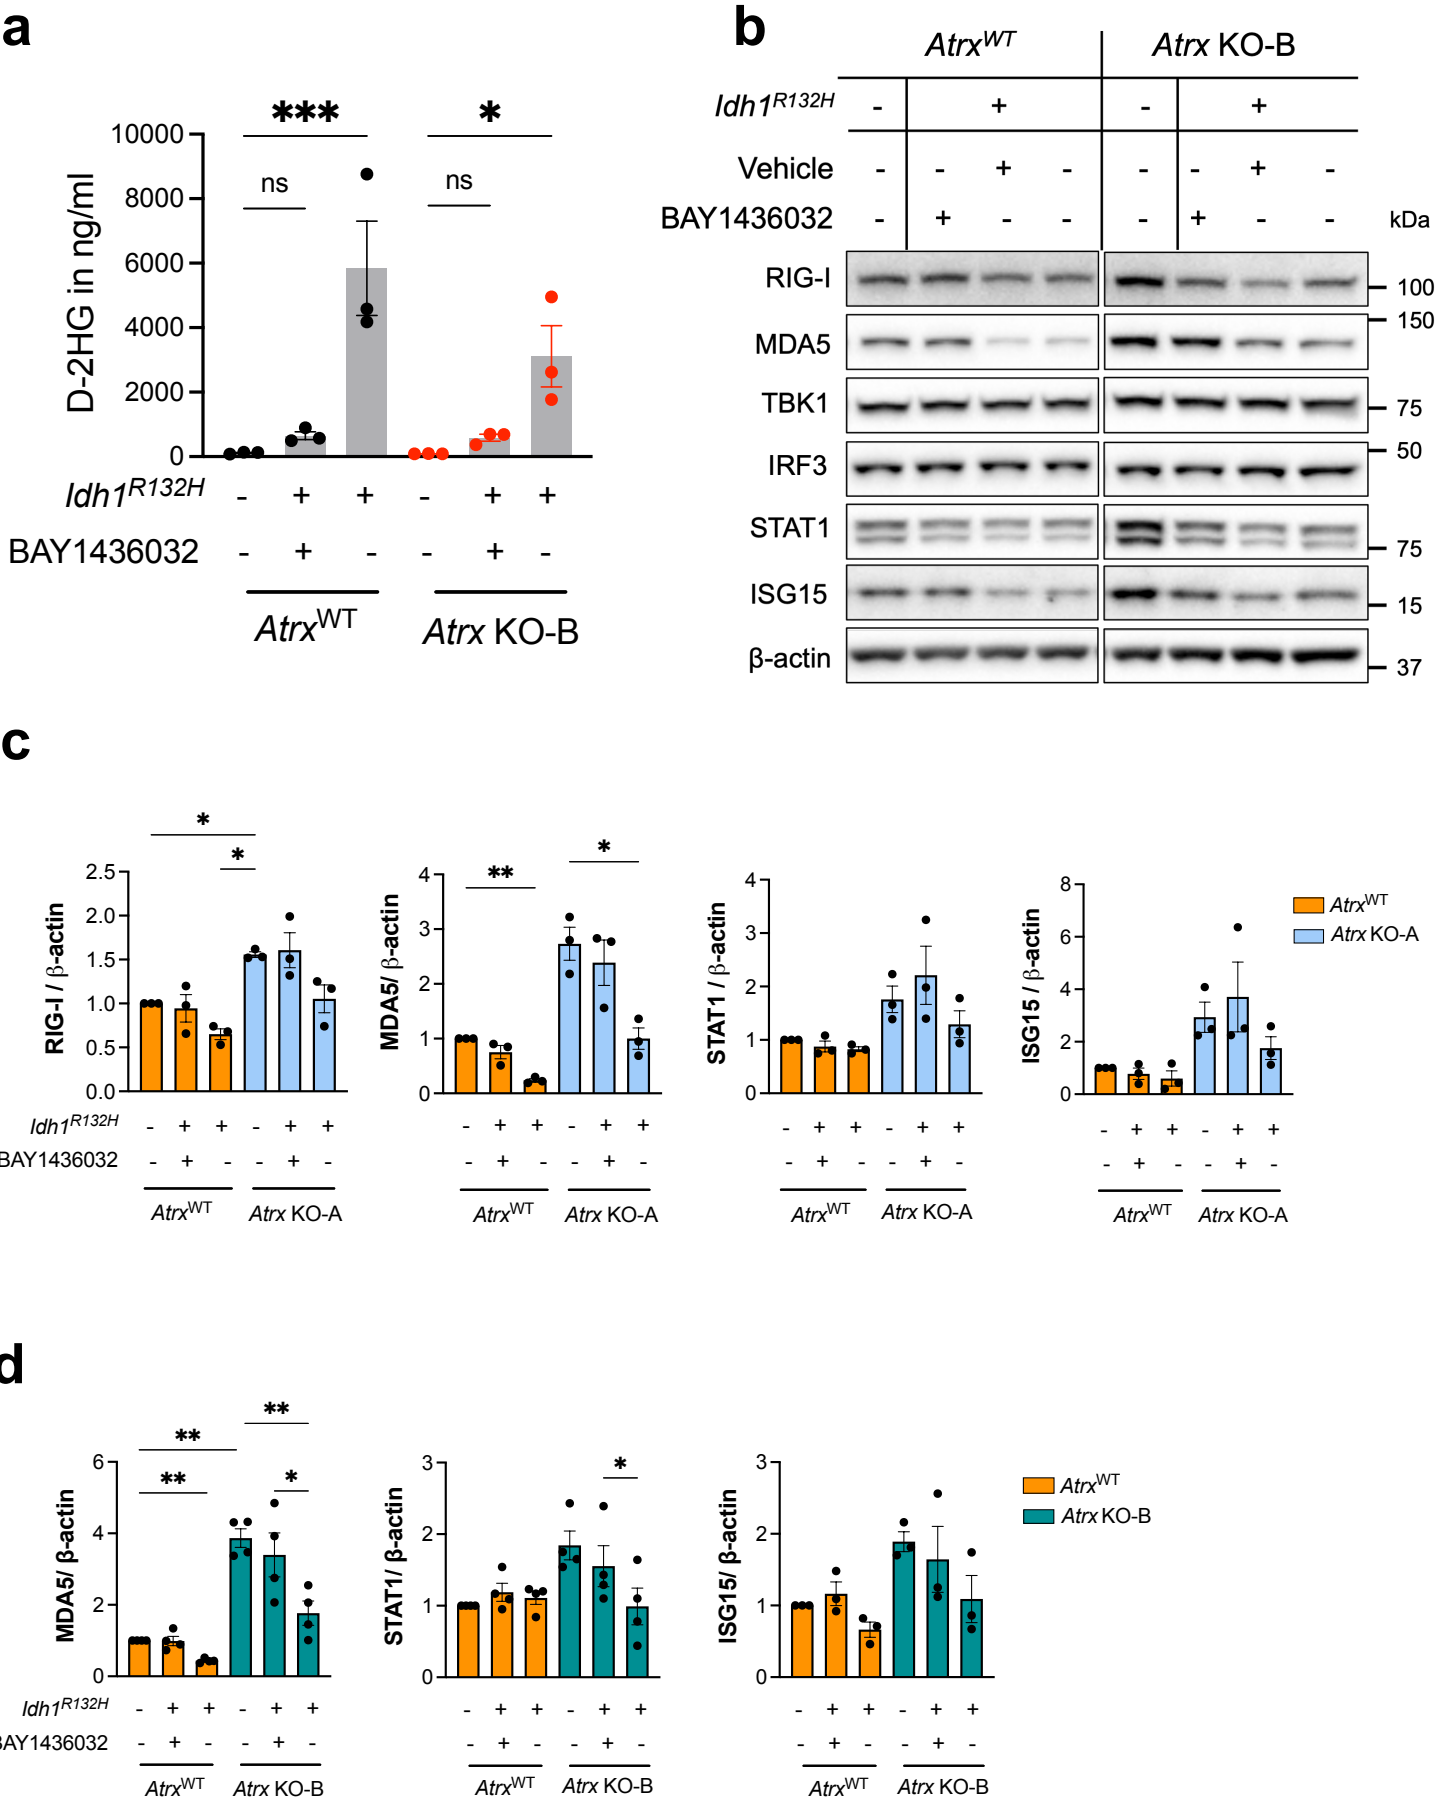

**Supplementary figure 15 – supporting figure 9. BAY1436032 partially reverses *IDH1*<sup>R132H</sup>-mediated immunosuppression.**

(a) D-2HG levels in conditioned media from CT2A CRISPR control (*Atrx*<sup>WT</sup>) or *Atrx* KO-B cells expressing *IDH1*<sup>R132H</sup>, or empty vector treated with 1  $\mu$ M BAY1436032 or vehicle every day for 3 days, normalized to total protein.

n=3 independent experiments. Data are presented as mean  $\pm$  SEM.

Asterisks indicate significant p-values from one-way ANOVA with Sidak post-hoc test. (\*: p<0.05, \*\*: p<0.01 \*\*\*: p<0.001).

(b) Representative Western blots using lysates from CT2A CRISPR control (*Atrx*<sup>WT</sup>) or *Atrx* KO-B cells expressing *IDH1*<sup>R132H</sup> or empty vector that were treated with 1  $\mu$ M BAY1436032 or vehicle every day for 3 days, screened for proteins involved in innate immune signaling.  $\beta$ -actin serves as the loading control.

N=3 independent experiments. (c) Densitometry values for proteins that are modulated upon BAY1436032 treatment in *IDH1*<sup>R132H</sup> - expressing CT2A lines shown in Fig. 9b and two other independent experiments (n=3).

Data are presented as mean  $\pm$  SEM. (d) Densitometry values for proteins that are modulated upon BAY1436032 treatment in *IDH1*<sup>R132H</sup> -

expressing CT2A lines shown in Supplementary Fig. 15b and other independent experiments (n=4 for MDA5, STAT1 and n=3 for ISG15). Data

are presented as mean  $\pm$  SEM and are normalized to  $\beta$ -actin loading

control and *Atrx*<sup>WT</sup>/ EV + Vehicle for every sample. Asterisks in S15c and S15d denote significant p-values from one-way ANOVA with Tukey's post

hoc test. (\*: p<0.05; \*\*: p<0.01; \*\*\*: p<0.001). Source data are provided as a Source Data file.

# Supplementary figure 16

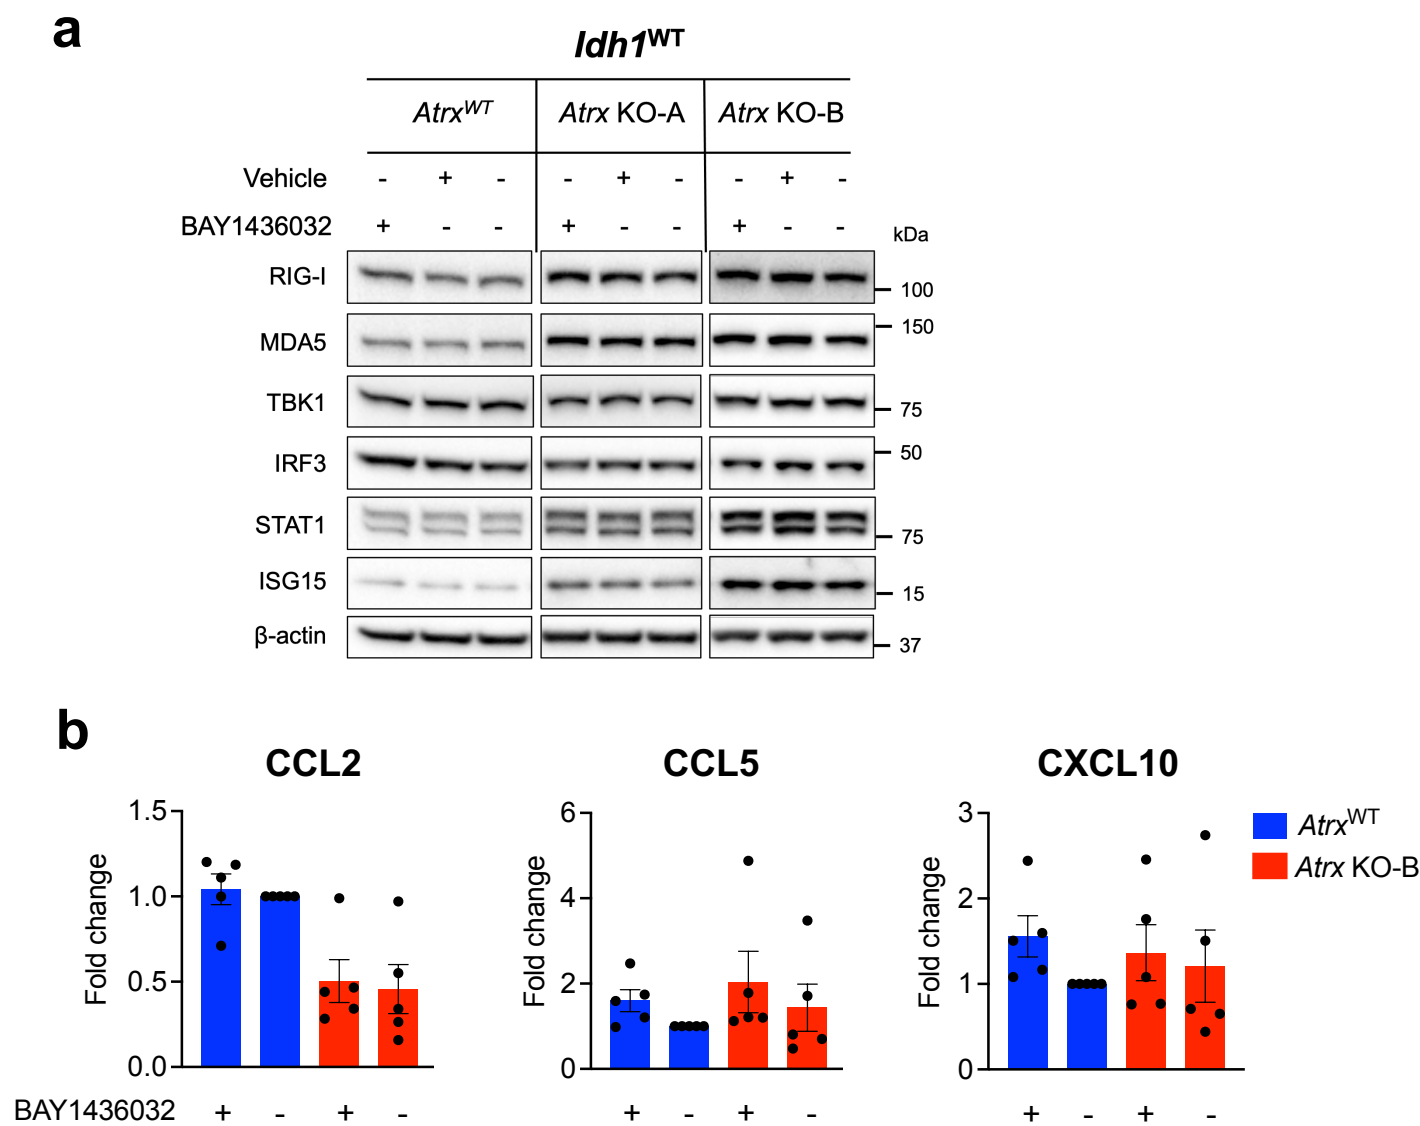

**Supplementary figure 16 – supporting figure 9. BAY1436032 partially reverses *IDH1<sup>R132H</sup>*-mediated immunosuppression.**

(a) Representative Western blots using lysates from CT2A CRISPR control (*Atrx<sup>WT</sup>*), *Atrx* KO-A or *Atrx* KO-B cells expressing MSCV empty vector (*Idh1<sup>WT</sup>*) that were treated with 1μM BAY1436032 or vehicle every day for 3 days, screened for proteins involved in innate immune signaling. β-actin serves as the loading control. N=3 independent experiments. (b) Cytokine/ chemokine levels in conditioned media from CT2A CRISPR control (*Atrx<sup>WT</sup>*) and *Atrx* KO-B cells expressing *IDH1<sup>R132H</sup>* treated with 1μM BAY1436032 or vehicle every day for 3 days. Supernatant cytokines were analyzed by cytokine bead arrays for antiviral and proinflammatory cytokines. Fold change values normalized to vehicle treated *Atrx<sup>WT</sup>* sample are plotted. Data are presented as mean ± SEM. N=3 independent experiments . One-way ANOVA with Tukey’s post-hoc test did not reveal any significant differences between groups. Source data are provided as a Source Data file.

## Supplementary figure 17

**a**

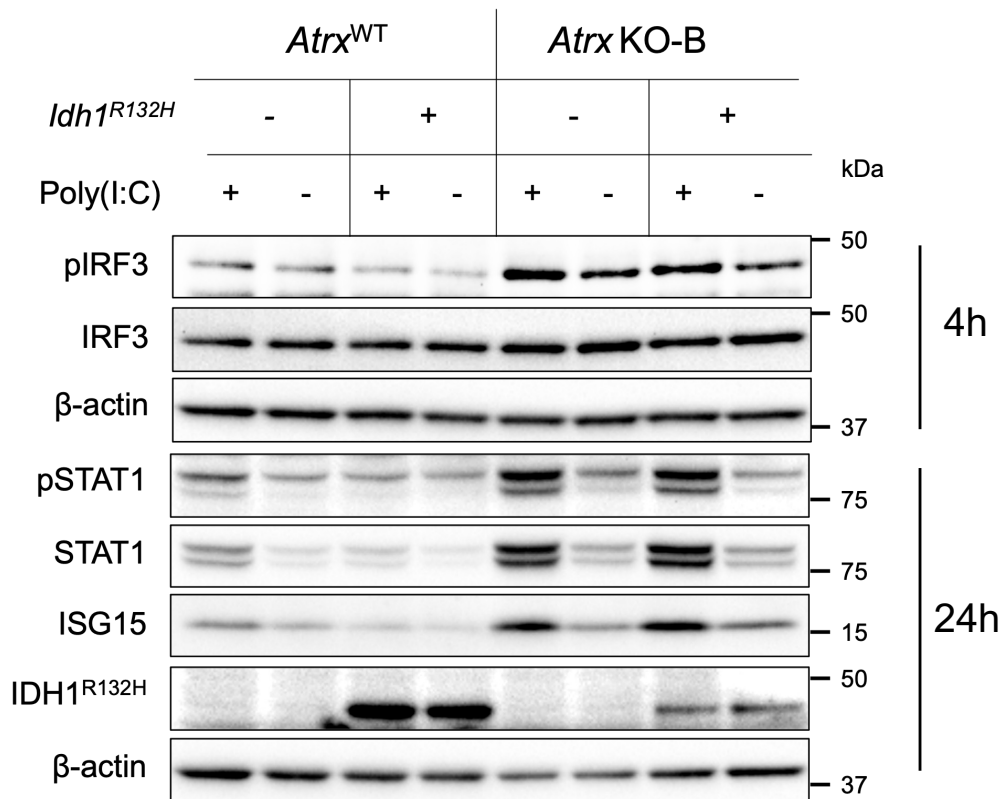**b**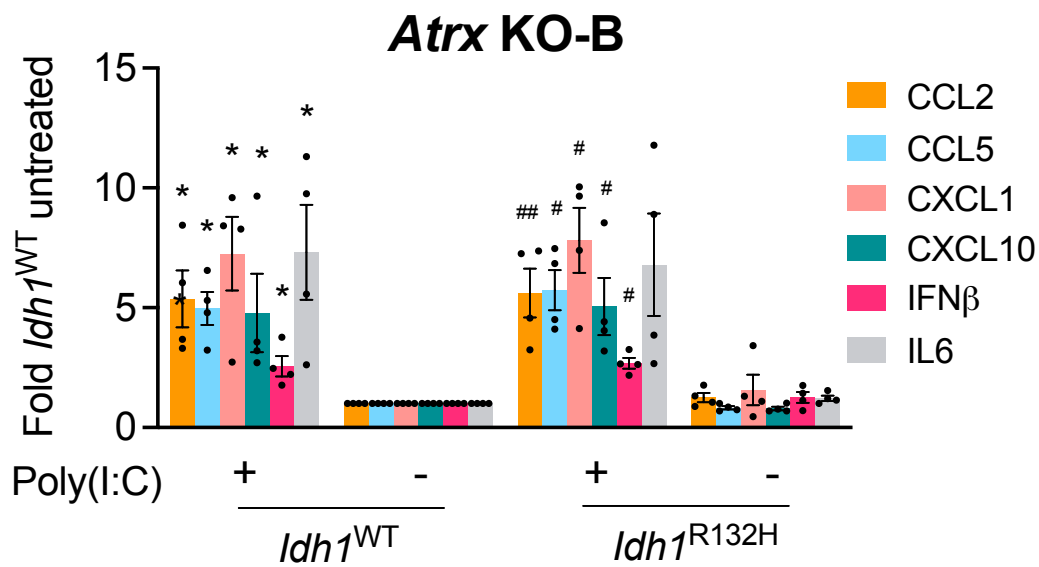

**Supplementary figure 17 - supporting main figure 10a-b. *Atrx* KO/*Idh1*<sup>R132H</sup> cells retain sensitivity to poly(I:C).**

(a) Representative Western blots using lysates from CT2A CRISPR control (*Atrx*<sup>WT</sup>) or *Atrx* KO-B cells expressing IDH1<sup>R132H</sup> or empty vector that were treated with 10µg/ml poly(I:C) HMW for 4hrs or 24hrs and screened for proteins involved in innate immune signaling. N=3 independent experiments. (b) Cytokine levels in conditioned media from CT2A *Atrx* KO-B cells expressing *Idh1*<sup>R132H</sup> or empty vector treated with poly(I:C) HMW for 24hrs. Supernatant cytokines were analyzed by cytokine bead arrays for antiviral and proinflammatory cytokines. Fold change values normalized to untreated *Atrx* KO-B/*Idh1*<sup>WT</sup> sample are shown as mean ± SEM. n= 4 independent experiments. Asterisks indicate significant p-values from one-way ANOVA with Tukey's post hoc test. Source data are provided as a Source Data file.

**Supplementary table 1:** Sequences of sgRNAs targeting human and mouse ATRX.

|                          |                           |
|--------------------------|---------------------------|
| sgRNA-hATRX-e9-sense     | CACCGTGTTGGCAGGTTTCATATTG |
| sgRNA-hATRX-e9-antisense | AAACCAATATGAACCTGCCAACAC  |

  

|                             |                           |
|-----------------------------|---------------------------|
| sgRNA-mATRX-ex9-1-sense     | CACCGTGTA AAAACTACACCGTTG |
| sgRNA-mATRX-ex9-1-antisense | AAACCAACGGTGTAGTTTTTACAC  |
| sgRNA-mATRX-ex9-2-sense     | CACCGTATCTGACGATGAACACTC  |
| sgRNA-mATRX-ex9-2-sense     | AAACGAGTGTTTCATCGTCAGATAC |



**Supplementary table 2:** Antibodies used in this study.

| Application    | Antibody                                 | Clone number | Company             | Catalog number | Dilution      |
|----------------|------------------------------------------|--------------|---------------------|----------------|---------------|
| Western Blot   | ATRX (Human specific)                    | D1N2E        | Cell signaling      | 14820          | 1:1000        |
|                | ATRX                                     | -            | Novus Biologicals   | NBP1-32851     | 1:1000        |
|                | ATRX                                     | E5X7O        | Cell signaling      | 10321          | 1:500         |
|                | IDH1 <sup>R132H</sup>                    | H09          | Dianova             | DIA-H09        | 1:1000        |
|                | IDH1 <sup>WT</sup>                       | D2H1         | Cell signaling      | 8137           | 1:1000        |
|                | Phospho IRF3 (Ser396)                    | 4D4G         | Cell signaling      | 4947           | 1:1000        |
|                | Phospho IRF3 (Ser396)                    | E.875.8      | Thermo scientific   | MA5-14947      | 1:1000        |
|                | Total IRF3 (Human specific)              | D9J5Q        | Cell signaling      | 10949          | 1:1000        |
|                | Total IRF3                               | 12A4A35      | Biologend           | 655702         | 1:1000        |
|                | Phospho STAT1 (Tyr701)                   | 58D6         | Cell signaling      | 9167           | 1:1000        |
|                | Total STAT1                              | -            | Cell signaling      | 9172           | 1:2000        |
|                | Total STAT1                              | D1K9Y        | Cell signaling      | 14994          | 1:1000        |
|                | Total TBK1                               | D1B4         | Cell signaling      | 3504           | 1:1000        |
|                | ISG15                                    | -            | Cell signaling      | 2743           | 1:2000        |
|                | RIG-I                                    | D14G6        | Cell signaling      | 3743           | 1:1000        |
|                | MDA5                                     | D74E4        | Cell signaling      | 5321           | 1:1000        |
|                | Vinculin                                 | hVIN-1       | Sigma               | V9264          | 1:5000        |
|                | β-actin                                  | -            | Cell signaling      | 4967           | 1:5000        |
|                | β-actin, HRP conjugated                  | 13E5         | Cell signaling      | 5125           | 1:5000        |
|                | β-tubulin, HRP conjugated                | 9F3          | Cell signaling      | 5346           | 1:5000        |
|                | Anti-rabbit IgG, HRP conjugated antibody | -            | Cell signaling      | 7074           | 1:2000-1:5000 |
|                | Anti-mouse IgG, HRP conjugated antibody  | -            | Cell signaling      | 7076           | 1:2000        |
| IHC            | ATRX                                     | E5X7O        | Cell signaling      | 10321          | 1:200         |
|                | CD3                                      | E4T1B        | Cell Signaling      | 78588          | 1:100         |
|                | CD45                                     | -            | Abcam               | ab10558        | 1:2000        |
|                | F4/80                                    | BM8          | Thermo scientific   | 14-4801-82     | 1:200         |
|                | IDH1 <sup>R132H</sup>                    | MRQ-67       | Cell Marque (Sigma) | 456R-34        | 1:25          |
| Flow cytometry | CD45.2-BUV395                            | 104          | BD Biosciences      | 564616         | 1:100         |
|                | CD45-BUV395                              | 30-F11       | BD Biosciences      | 564279         | 1:100         |
|                | CD3-FITC                                 | 17A2         | BioLegend           | 100204         | 1:100         |

|                  |                                             |             |                |            |                 |
|------------------|---------------------------------------------|-------------|----------------|------------|-----------------|
|                  | CD3-PE                                      | 17A2        | Biolegend      | 100205     | 1:100           |
|                  | CD19-FITC                                   | 1D3/CD19    | BioLegend      | 152404     | 1:100           |
|                  | NK1.1-BV421                                 | PK136       | BioLegend      | 108732     | 1:100           |
|                  | NK1.1-BV605                                 | PK136       | Biolegend      | 108753     | 1:100           |
|                  | CD11b-BV711                                 | M1/70       | BioLegend      | 101242     | 1:100           |
|                  | CD11b-APC-Cy7                               | ICRF44      | BD Biosciences | 560914     | 1:100           |
|                  | CD4-FITC                                    | RM4-5       | BioLegend      | 100510     | 1:100           |
|                  | CD4-FITC                                    | GK1.5       | Biolegend      | 100406     | 1:100           |
|                  | CD8-BV421                                   | 53-6.7      | BioLegend      | 100738     | 1:100           |
|                  | F4/80-APC                                   | BM8         | Invitrogen     | 17-4801-82 | 1:100           |
|                  | Ly6G-PE                                     | 1A8         | BioLegend      | 127608     | 1:100           |
|                  | Ly-6G- PE-Cy7                               | 1A8         | BD Biosciences | 560601     | 1:100           |
|                  | Ly-6C-PerCP/Cy5.5                           | HK1.4       | Biolegend      | 128012     | 1:100           |
|                  | IA/IE-BV786                                 | M5/114.15.2 | BD Biosciences | 742894     | 1:100           |
| T-cell depletion | <i>InVivo</i> MAb Rat IgG2b Isotype control | LTF-2       | BioXcell       | BE0090     | 250µg per mouse |
|                  | <i>InVivo</i> MAb Anti-mouse CD4            | GK1.5       | BioXcell       | BE0003-1   | 250µg per mouse |
|                  | <i>InVivo</i> MAb Anti-mouse CD8 $\alpha$   | 2.43        | BioXcell       | BE0061     | 250µg per mouse |
